## **Convergent evolution of SARS-CoV-2 spike mutations, L452R, E484Q and P681R, in the second wave of COVID-19 in Maharashtra, India**

Sarah Cherian<sup>1, #</sup>, Varsha Potdar<sup>1, #</sup>, Santosh Jadhav<sup>1</sup>, Pragya Yadav<sup>1</sup>, Nivedita Gupta<sup>2</sup>, Mousmi Das<sup>1</sup>, Partha Rakshit<sup>3</sup>, Sujeet Singh<sup>3</sup>, Priya Abraham<sup>1\*</sup>, Samiran Panda<sup>2</sup> and NIC team<sup>@</sup>

# Equal authorship

\* Corresponding author

<sup>1</sup> ICMR-National Institute of Virology, Pune

<sup>2</sup> Indian Council of Medical Research, N. Delhi

<sup>3</sup> National Centre for Disease Control, New Delhi

@ Sucheta Patil, Prachi Jagtap, Bhagyashri Kasabe, Ujjaini Shah, Trupti Sanjeev, Gayatri Divekar, Kalpita Korabu, Sunil Shelkande, Pooja Shinde, Sayed Zakiuddin, Veena Vipat, Sheetal Jadhav, Krutika Iyengar, Vinita Malik, Sonali Bhorekar, Abhinendra Kumar, Rima Sahay, Anita Shete, M.L.Choudhary from National Influenza Center (NIC)

## Abstract

As the global severe acute respiratory syndrome coronavirus 2 (SARS-CoV-2) pandemic expands, genomic epidemiology and whole genome sequencing are being constantly used to investigate its transmissions and evolution. In the backdrop of the global emergence of “variants of concern” (VOCs) during December 2020 and an upsurge in a state in the western part of India since January 2021, whole genome sequencing and analysis of spike protein mutations using sequence and structural approaches was undertaken to identify possible new variants and gauge the fitness of current circulating strains.

Phylogenetic analysis revealed that the predominant clade in circulation was a distinct newly identified lineage B.1.617 possessing common signature mutations D111D, G142D, L452R, E484Q, D614G and P681R, in the spike protein including within the receptor binding domain (RBD). Of these, the mutations at residue positions 452, 484 and 681 have been reported in other globally circulating lineages. The structural analysis of RBD mutations L452R and E484Q along with P681R in the furin cleavage site, revealed that these may possibly result in increased ACE2 binding and rate of S1-S2 cleavage resulting in better transmissibility. The same two RBD mutations indicated decreased binding to select monoclonal antibodies (mAbs) and may affect their neutralization potential. Experimental validation against a wider panel of mAbs, sera from vaccinees and those that recovered from natural infection needs to be studied.

The emergence of such local variants through the accumulation of convergent mutations during the COVID-19 second wave needs to be further investigated for their public health impact in the rest of the country and its possibility of becoming a VOC.

## Introduction

The severe acute respiratory syndrome coronavirus 2 (SARS-CoV-2) surface spike (S) protein mediates entry into host cells by binding to the host receptor angiotensin-converting enzyme 2 (ACE2) via its receptor-binding domain (RBD). Crystal structures of SARS-CoV-2 S protein or its RBD complexed with ACE2 from different hosts reveal that the RBD contains a core and a receptor-binding motif (RBM) which forms contacts with ACE2<sup>1</sup>. A number of naturally selected mutations in the RBM have been shown to affect infectivity, human-to-human transmission, pathogenesis and immune escape<sup>2</sup>.

As the global SARS-CoV-2 pandemic expands, genomic epidemiology and whole genome sequencing are being constantly used to investigate the transmissions and evolution. The expansion of the genome-wide diversity resulted in delineation of the viral strains into clades, lineages, and sub-lineages. Clades G/GH/GR/GV/GRY as per the Global Initiative on Sharing All Influenza Data (GISAID) database (<https://www.gisaid.org/>)<sup>3</sup> possess a common mutation D614G in the spike protein. The mutation was shown to result in significantly higher human host infectivity and better transmission efficiency to the virus<sup>4,5</sup>. Three recently emerged “variants of concern” (VOCs) of SARS-CoV-2 are the UK-variant 501Y.V1/B.1.1.7, South Africa variant 501.V2/ B.1.351 and Brazilian variant 501Y.V3/P.1 (alias of lineage B.1.1.28.1). These variants are known to possess multiple mutations across the genome, including several in the S protein and its RBD such as N501Y, E484K and K417N/T<sup>5-7</sup>. Multiple SARS-CoV-2 variants are now seen to be circulating globally.

The potential introduction and consequence of these emerging variants in the country is vital to support the public health response. The National Influenza Centre at the ICMR-National Institute of Virology, Pune, as an apex laboratory of the Indian Council of Medical Research (ICMR) has been continuously involved in the SARS-CoV-2 diagnostics and monitoring the genomic evolution of this virus. In addition, the ICMR-NIV, Pune is also one among the ten national laboratories of the Indian SARS-CoV-2 Consortium on Genomics (INSACOG), Ministry of Health and Family Welfare, Government of India, catering to western India. In the backdrop of the global emergence of VOCs and an upsurge in Maharashtra, a state in the western part of India, enhanced sequencing was undertaken. This was to identify possible new variants and

analyze spike protein mutants, in particular, to gauge the fitness of current circulating strains, using bioinformatics sequence and molecular structural approaches.

## Materials and methods

The State of Maharashtra (latitude 19°39' N, longitude 75°18'E) is located in west central India, in the north western part of the Indian Subcontinent. Since the end of January 2021, a concentrated spurt in COVID-19 cases was noted in several districts of Maharashtra (**Suppl. Fig. 1**). As per the State Government directives, samples from international travelers and 5% of surveillance samples from the positive cases with Ct value <25 including those from clusters, long haulers, mild/moderate/severe and deceased cases, were referred to the ICMR-NIV, Pune for whole genome sequencing. Nasopharyngeal swabs (n=733, November 25, 2020- March 31, 2021) were processed for whole genome sequencing.

Briefly, nucleic acid extraction was performed using 280 µL of each sample in duplicate by Qiagen viral RNA extraction protocol and quantified RNA was further processed for template preparation using the Ion Chef System. Purified template beads were submitted to meta transcriptome next-generation sequencing (NGS) in the Ion S5 platform (ThermoFisher Scientific) using an Ion 540™ chip and the Ion Total RNA-Seq kit v2.0, as per the manufacturer's protocol (ThermoFisher Scientific)<sup>8</sup>. Sequence data was processed using the Torrent Suite Software (TSS) v5.10.1 (ThermoFisher Scientific, USA). Coverage analysis plugins were utilized to generate coverage analysis report for each of the samples. Reference-based reads gathering, and assembly were performed for all the samples using Iterative refinement meta-assembler (IRMA)<sup>9</sup>. A subset of the samples (were also sequenced on the Illumina machine and analyzed using on the CLC Genomics Workbench version 20 (CLC, Qiagen) as described elsewhere<sup>10</sup>. Of 733 whole genomes obtained, 598 were considered for different analyses based on coverage of  $\geq 93\%$  of the genome. For each whole genome sequence, the GISAID Clade assignment, was done using CoVsurver: Mutation Analysis of hCoV-19 (<https://www.gisaid.org/epiflu-applications/covsurver-mutations-app/>). For lineage assignment, the web application ie., Phylogenetic Assignment of Named Global Outbreak LINEages (PangoLIN) COVID-19 Lineage Assigner (<https://pangolin.cog-uk.io/>), was implemented<sup>7</sup>. The 598 genomes were aligned using MUSCLE and a Maximum Likelihood phylogenetic tree was constructed using IQ-tree v1.6<sup>11,12</sup>, employing the GTR as the substitution model and 1,000

bootstrap replications. The average frequency of nonsynonymous mutations in the genomes over the period from 1st December, 2020 to 31<sup>st</sup> March, 2021 was calculated, considering Wuhan as the reference strain.

For further structural characterization of the S protein mutations, the crystal structure of SARS-CoV-2 S glycoprotein complexed with ACE2 was obtained from the protein data bank (PDB ID: 7A98<sup>13</sup>). The top ten mutations in the S protein were mapped using Biovia Discovery studio visualizer 2020. To assess the effect of noted RBD mutations on ACE2 binding, the crystal structure of SARS-CoV-2 spike RBD domain complexed with ACE2 (PDB ID: 6LZG<sup>14</sup>) was used. For assessment of the noted mutations on binding to neutralizing antibodies, the SARS-CoV-2 spike RBD domain complexed with two selected mAbs REGN10933/ P2B-2F6 were retrieved (PDB ID: 6XDG; resolution 3.90Å and 7BWJ; resolution 2.65 Å respectively)<sup>15,16</sup>. Point mutations were carried out using Biovia Discovery studio visualizer 2020 and the structures of the complexes were subjected to energy minimization using macro model tool in Schrodinger 2020 using default parameters. The molecular interactions between the RBD-ACE2 interface, within the RBD and between the neutralizing mAbs-RBD were analyzed using non-bonded interactions tool in Biovia Discovery studio visualizer 2020.

## Results

The genomic surveillance for the spurt in the COVID-19 cases in Maharashtra was carried out to identify the circulating lineages/VOCs and identify possible functionally-significant mutations in the spike protein.

PangoLIN lineage classification of 598 whole genomes revealed the presence of 47 lineages (**Supplementary Table 1**), all within GISAID clade G, evident from the D614G mutation in the S protein. Lineages B.1.617 (n=273), B.1.36.29 (n=73), B.1.1.306 (n=67), B.1.1.7 (n=31), B.1.1.216 (n=24), B.1.596 (n=17), B.1 (n=17), B.1.1 (n=15) and B.1.36 (n=12) were found to be the predominant lineages (**Supplementary Figure 1**). Phylogenetic analysis revealed four sub-clusters within B.1.617 that could be linked to mutations specific to the spike region (**Figure 1**). Among these, cluster B.1.617:C (n=107), included majority of the strains from eastern part of Maharashtra while B.1.617:B (n=80) also included sequences from major cities like Pune, Thane and Aurangabad, more on the western part of the State. The frequency of mutations L452R and

E484Q within the RBD and mutations G142D and P681R within the spike but outside the RBD region, increased from January 2021 (**Figure 2**). The P681R is noted in the S1-S2 furin-cleavage site. A mutation H1101D specific to clusters B.1.617: A and B.1.617:B, was not noted in January 2021 (**Figure 1**). The B.1.617:C cluster possessed a T95I-specific mutation. Notably a small cluster of B.1.617 (n=21) emerged in late March and did not possess the E484Q mutation. This clustered with lineage B.1.596 and shared common mutations T19R and D950N in the spike protein. A synonymous mutation D111D was observed to be co-occurring with the RBD mutations L452R and E484Q and it was absent in the cluster that did not possess E484Q (Figure 1). Based on the monthly averages of non-synonymous mutation events when compared to the Wuhan reference strain NC\_045512.2, an increased frequency of non-synonymous mutations was noted in February 2021 (**Figure 3**).

The key mutations in the S protein are mapped on a furin-cleaved structure of the S protein (**Figure 4**). The structural implications of the RBD mutations (L452R and E484Q) were analyzed in terms of interaction with the ACE2 receptor and neutralizing antibodies that are known to have interactions with these residues. Effect of the E484Q mutation is noted in terms of disruption in an electrostatic bond of the spike RBD residue E484 with K31 in the ACE2 interaction interface (**Figure 5A, Supplementary Table 2**). The intramolecular interactions in the wild strain indicate that the L452 residue is involved in a hydrophobic interaction with L492 which forms another hydrophobic contact with F490. These residue interactions form a hydrophobic patch on the surface of the RBD. The L452R mutation abolishes the hydrophobic interaction with L492 of the RBD. Estimation of the minimized energies of the wild and mutant structures of RBD complexed with ACE2 showed energy values of -93732.305 kcal/mol and -94543.180 kcal/mol respectively.

The mutations L452R and E484Q are seen to disrupt the interfacial interactions of spike RBD with specific neutralizing antibodies (**Figure 5B, C; Supplementary Table 3**). The heavy chain of monoclonal antibody REGN10933 interacts with the RBD by making two hydrogen bonds (H-bonds) between E484 of the RBD and Y53 and S56 of the antibody. Residue Y453 of the RBD makes an H-bond with D31 of the heavy chain of the antibody. The RBD mutation E484Q disrupts the 2 H-bonds with S56 and Y53 (**Figure 5B**). Residues L452 and E484 possess direct contacts with the mAb P2B-2F6 (**Figure 5C**). The intermolecular interactions of the wild-type

complex indicate that L452 is involved in hydrophobic interactions with residues I103 and V105 of the heavy chain of the antibody. Residue E484 forms H-bonds with N33 and Y34 of the light chain as well as a salt bridge and H-bond interaction with R112 side chain of the light chain. The L452R mutation breaks the hydrophobic interactions with both residues I103 and V105 and also disrupts the H-bond and electrostatic interaction with R112.

## Discussion

In addition to the three global VOCs, some of the global variants of interest (VUIs) include B.1.525/ VUI-202102/03 that emerged in UK ([https://cov-lineages.org/global\\_report\\_B.1.525.html](https://cov-lineages.org/global_report_B.1.525.html)), B.1.1.49 that emerged in Denmark ([https://cov-lineages.org/lineages/lineage\\_B.1.1.49.html](https://cov-lineages.org/lineages/lineage_B.1.1.49.html)) and A.23.1 that was first detected in Uganda ([https://cov-lineages.org/global\\_report\\_A.23.1.html](https://cov-lineages.org/global_report_A.23.1.html)). The potential consequences of emerging variants are increased transmissibility, increased pathogenicity and the ability to escape natural or vaccine-induced immunity<sup>17,18</sup>. With this background, we sequenced and analyzed the whole genomes of SARS-CoV-2 from different districts of Maharashtra where a surge in COVID-19 activity was noted since the end of January 2021 after a gap of almost four months.

Phylogenetic and sequence analyses revealed that only a small proportion of sequences majorly in the month of December 2020, were detected as the VOC B.1.1.7, UK-variant. On the other hand, the B.1.617 lineage possessing common signature mutations G142D, L452R, E484Q, D614G and P681R, in the spike protein could be linked to the increase in the proportion of non-synonymous mutations in February 2021. In addition, districts in western Maharashtra, such as Pune, Mumbai, Thane and Nashik showed presence of multiple lineages in circulation in comparison to the dominance of lineage B.1.617 in eastern Maharashtra (Supplementary figure 1). The co-occurrence of synonymous mutations with the non-synonymous mutations observed is interesting and being reported<sup>19,20</sup>. Notably D111D was found to be associated with the signature mutations.

The structural analysis of the effect of RBD mutations L452R and E484Q towards ACE2 binding, revealed decrease in intra-molecular and intermolecular contacts with respect to the wild-type. However, the hydrophobic L452 residue mutation to the hydrophilic 452R might help in interaction with water molecules and overall stabilization of the complex, as was reflected in

the lower minimum energy of the mutant complex. Another significant mutation P681R in the furin cleavage site, resulting in enhancement of the basicity of the poly-basic stretch, might help in increased rate of membrane fusion, internalization and thus better transmissibility. *In vitro* and/or *in vivo* studies to understand the phenotypic effects of the mutant strains would be vital in this regard. Structural analysis further showed that the two RBD mutations L452R and E484Q may decrease the binding ability of REGN10933 and P2B-2F6 antibodies to the variant strains, compared to that in the wild-type strain. A recent report<sup>21</sup> revealed that the L452R mutation reduced or abolished neutralizing activity of 14 out of 35 RBD-specific mAbs including three clinical stage mAbs. Another recent study<sup>22</sup> has demonstrated that the mutation L452R can escape from human leukocyte antigen (HLA)-24-restricted cellular immunity and can also increase viral infectivity, potentially promoting viral replication. The combination of the two RBD mutations noted in this study could affect the neutralization of the select mAbs. The neutralizing potential of a wider range of mAbs against the strains of lineage B.1.617 needs to be assessed. Further the level of neutralization efficacy of sera from vaccinees of different vaccine formulations and those who experienced natural infection also needs to be studied.

Mutations at both the residue positions 452 and 484 individually have been reported earlier. L452R has been noted in California lineages B.1.427 and B.1.429 while E484K mutation is common to the three VOCs having global impact. E484Q has also been reported in several sequences in the GISAID with the earliest strain noted in Denmark. P681H is one of the mutations in the UK-variant B.1.1.7 while P681R is one of the mutations in the VUI lineage A.23.1. The unique combination of mutations L452R, E484Q and P681R noted in this study is an indication of convergent evolution.

To summarize, the study investigated the S protein mutations associated with the COVID-19 cases in Maharashtra observed since the month of February 2021. The continuous increase in positivity could be attributed to signature mutations in the spike protein and functionally significant co-occurring mutations. As per GISAID submissions, the B.1.617 lineage has been reported from several countries including UK, USA, Switzerland, Germany, Singapore etc. However, the emergence of such local variants during the COVID-19 second wave in India needs to be further investigated for their public health impact and its possibility of becoming a VOC.



**Funding:** Intramural funding of the Indian Council of Medical Research-National Institute of Virology, Pune, supported this work.

**Acknowledgement:** Authors are grateful to the Director Health Services of Maharashtra and State Integrated Disease Surveillance Program (IDSP) for coordination of samples. We also acknowledge the cohesive efforts of NIC staff. The authors also acknowledge the support of Dr. Balram Bhargava, Secretary, Department of Health Research, Government of India and Director General, Indian Council of Medical Research, N. Delhi.

**Competing interests:** No competing interest exists among the authors.

### References:

1. Shang J, Ye G, Shi K, et al. Structural basis of receptor recognition by SARS-CoV-2. *Nature*. Nature Publishing Group; **2020**; 581(7807):221–224.
2. Wan Y, Shang J, Graham R, Baric RS, Li F. Receptor Recognition by the Novel Coronavirus from Wuhan: an Analysis Based on Decade-Long Structural Studies of SARS Coronavirus. Gallagher T, editor. *J Virol*. **2020**; 94(7):e00127-20, /jvi/94/7/JVI.00127-20.atom.
3. Elbe S, Buckland Merrett G. Data, disease and diplomacy: GISAID’s innovative contribution to global health. *Global Challenges*. Wiley Online Library; **2017**; 1(1):33–46.
4. Korber B, Fischer WM, Gnanakaran S, et al. Tracking Changes in SARS-CoV-2 Spike: Evidence that D614G Increases Infectivity of the COVID-19 Virus. *Cell*. **2020**; 182(4):812–827.e19.
5. Volz E, Hill V, McCrone JT, et al. Evaluating the Effects of SARS-CoV-2 Spike Mutation D614G on Transmissibility and Pathogenicity. *Cell*. **2021**; 184(1):64–75.e11.
6. Leung K, Shum MH, Leung GM, Lam TT, Wu JT. Early transmissibility assessment of the N501Y mutant strains of SARS-CoV-2 in the United Kingdom, October to November 2020. *Eurosurveillance*. European Centre for Disease Prevention and Control; **2021**; 26(1):2002106.
7. Rambaut A, Holmes EC, O’Toole Á, et al. A dynamic nomenclature proposal for SARS-CoV-2 lineages to assist genomic epidemiology. *Nature Microbiology*. Nature Publishing Group; **2020**; 5(11):1403–1407.
8. Potdar V, Vipat V, Ramdasi A, et al. Phylogenetic classification of the whole-genome sequences of SARS-CoV-2 from India & evolutionary trends. *Indian Journal of Medical Research*. **2021**; 153(1):166.

9. Shepard SS, Meno S, Bahl J, Wilson MM, Barnes J, Neuhaus E. Viral deep sequencing needs an adaptive approach: IRMA, the iterative refinement meta-assembler. *BMC genomics*. Springer; **2016**; 17(1):708.
10. Yadav PD, Potdar VA, Choudhary ML, Nyayanit DA, Agrawal M, Jadhav SM, et al. Full-genome sequences of the first two SARS-CoV-2 viruses from India. *Indian J Med Res* 2020; 151: 200-9.
11. Edgar RC. MUSCLE: multiple sequence alignment with high accuracy and high throughput. *Nucleic Acids Research*. **2004**; 32(5):1792–1797.
12. Nguyen L-T, Schmidt HA, Haeseler A von, Minh BQ. IQ-TREE: A Fast and Effective Stochastic Algorithm for Estimating Maximum-Likelihood Phylogenies. *Molecular Biology and Evolution*. **2015**; 32(1):268–274.
13. Benton DJ, Wrobel AG, Xu P, et al. Receptor binding and priming of the spike protein of SARS-CoV-2 for membrane fusion. *Nature*. **2020**; 588(7837):327–330.
14. Wang Q, Zhang Y, Wu L, et al. Structural and Functional Basis of SARS-CoV-2 Entry by Using Human ACE2. *Cell*. **2020**; 181(4):894-904.e9.
15. Hansen J, Baum A, Pascal KE, et al. Studies in humanized mice and convalescent humans yield a SARS-CoV-2 antibody cocktail. *Science*. American Association for the Advancement of Science; **2020**; 369(6506):1010–1014.
16. Ju B, Zhang Q, Ge J, et al. Human neutralizing antibodies elicited by SARS-CoV-2 infection. *Nature*. Nature Publishing Group; **2020**; 584(7819):115–119.
17. Greaney AJ, Loes AN, Crawford KHD, et al. Comprehensive mapping of mutations in the SARS-CoV-2 receptor-binding domain that affect recognition by polyclonal human plasma antibodies. *Cell Host Microbe*. **2021**; 29(3):463-476.e6.
18. Garcia-Beltran WF, Lam EC, St Denis K, et al. Multiple SARS-CoV-2 variants escape neutralization by vaccine-induced humoral immunity. *Cell*. **2021**; .
19. Sarkar R, Mitra S, Chandra P, et al. Comprehensive analysis of genomic diversity of SARS-CoV-2 in different geographic regions of India: an endeavour to classify Indian SARS-CoV-2 strains on the basis of co-existing mutations. *Arch Virol*. **2021**; 166(3):801–812.
20. Zeng H-L, Dichio V, Horta ER, Thorell K, Aurell E. Global analysis of more than 50,000 SARS-CoV-2 genomes reveals epistasis between eight viral genes. *PNAS*. National Academy of Sciences; **2020**; 117(49):31519–31526.
21. McCallum M, Bassi J, Marco A, et al. SARS-CoV-2 immune evasion by variant B.1.427/B.1.429. *bioRxiv [Preprint]*. 2021 Apr 1:2021.03.31.437925. doi: 10.1101/2021.03.31.437925. PMID: 33821281; PMCID: PMC8020983.

22. Motozono C, Toyoda M, Zahradnik J, et al. An emerging SARS-CoV-2 mutant evading cellular immunity and increasing viral infectivity. bioRxiv 2021.04.02.438288; doi: <https://doi.org/10.1101/2021.04.02.438288>.

### **Legends to figures and Tables:**

**Figure 1:** Maximum-likelihood tree of representative SARS-CoV-2 genomes depicting PangoLIN lineages and the co-occurring mutations in the spike protein in the sub-clusters of lineage B.1.617.

**Figure 2:** Monthly average of non-synonymous mutations (trend-line) against the total SARS-CoV-2 samples studied (blue bars).

**Figure 3:** Trend of major mutations in the spike protein from December, 2020 to March, 2021.

**Figure 4:** Mapping of key mutations on the furin-cleaved crystal structure of SARS-CoV-2 spike glycoprotein (grey surface view) in complex with ACE2 (brown solid ribbon). RBD region shown in green

**Figure 5:** (A) Key interactions between ACE2-RBD involving major mutational hotspots in the RBD (B) Interactions between RBD-mAb REGN10933 (C) Interactions between RBD-mAb P2B-2F6. wt, corresponds to wild-type strain and mt, mutant strain. In (A), also shown are the intra-molecular contacts in a hydrophobic patch of the RBD region (surface displayed in grey color). In (B) and (C) blue represents heavy chain and red, light chain.

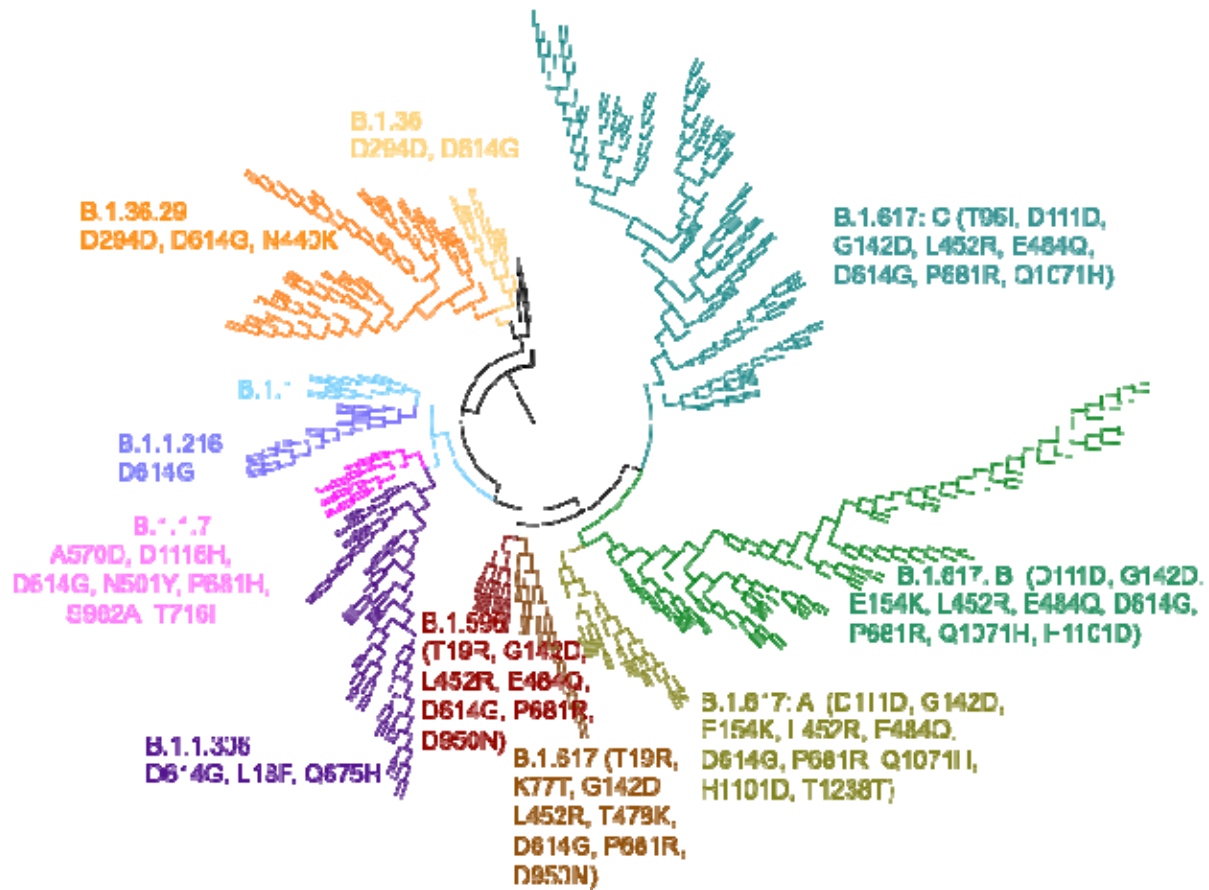

**Figure 1:** Maximum-likelihood tree of representative SARS-CoV-2 genomes depicting PangoLIN lineages and the co-occurring mutations in the spike protein in the sub-clusters of lineage B.1.617.

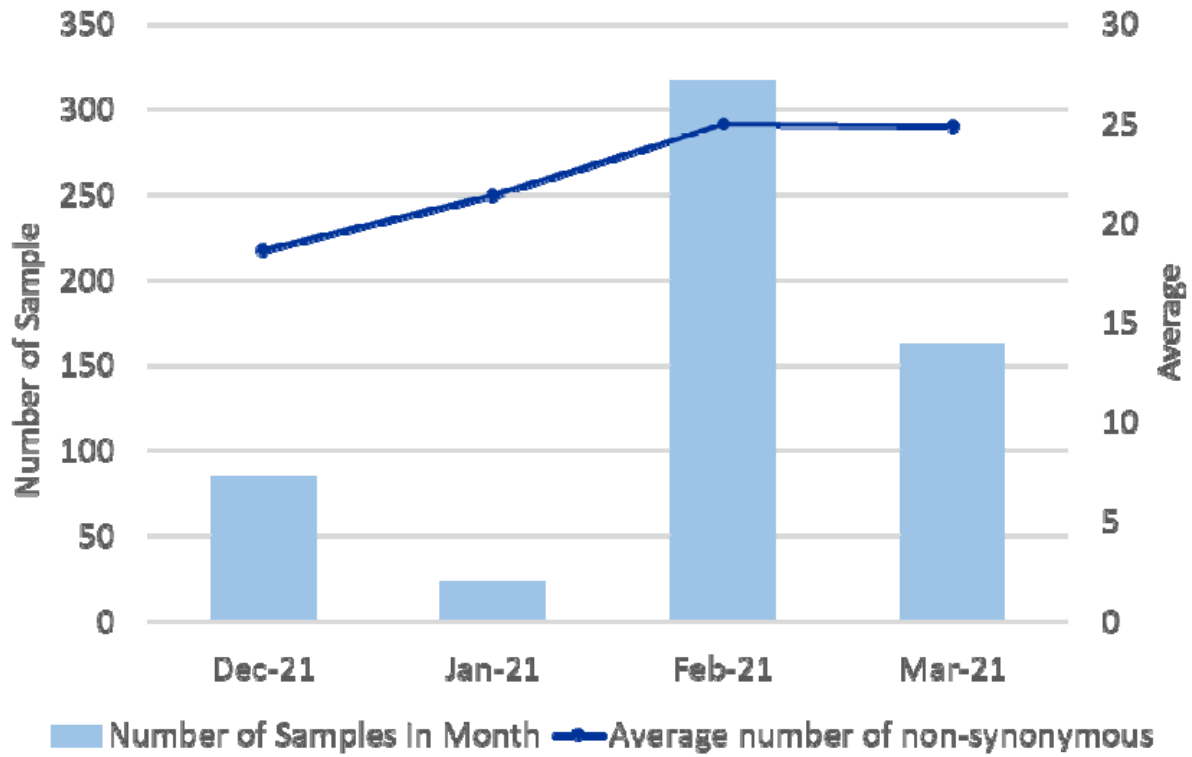

**Figure 2:** Monthly average of non-synonymous mutations (trend-line) against the total SARS-CoV-2 samples studied (blue bars).

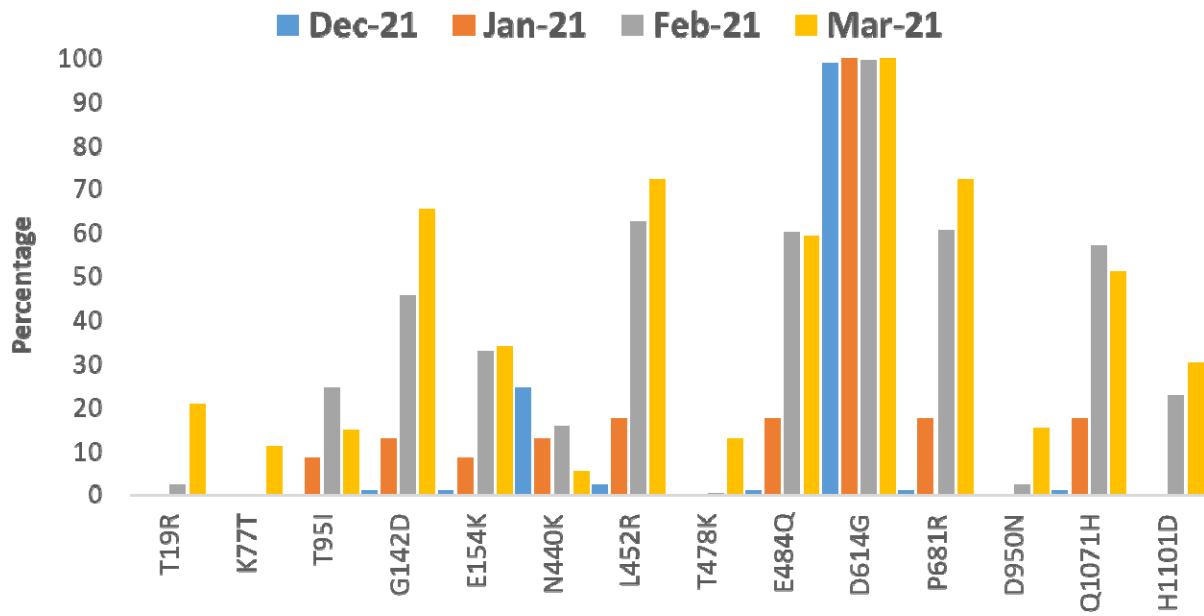

**Figure 3:** Trend of major mutations in the spike protein from December, 2020 to March, 2021.

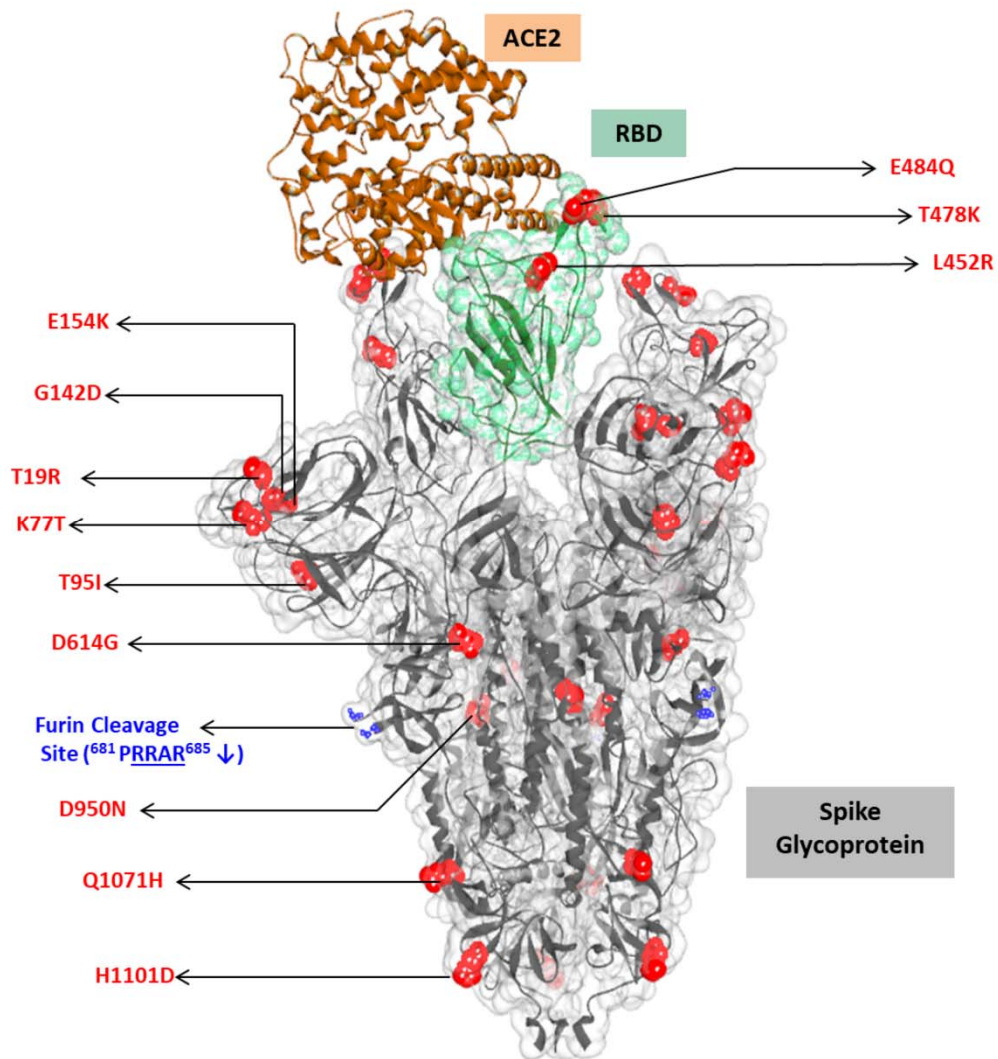

**Figure 4:** Mapping of key mutations on the furin-cleaved crystal structure of SARS-CoV-2 spike glycoprotein (grey surface view) in complex with ACE2 (brown solid ribbon). RBD region shown in green

**Figure 5:** (A) Key interactions between ACE2-RBD involving major mutational hotspots in the RBD (B) Interactions between RBD-mAb REGN10933 (C) Interactions between RBD-mAb P2B-2F6. wt, corresponds to wild-type strain and mt, mutant strain. In (A), also shown are the intra-molecular contacts in a hydrophobic patch of the RBD region (surface displayed in grey color). In (B) and (C) blue represents heavy chain and red, light chain.

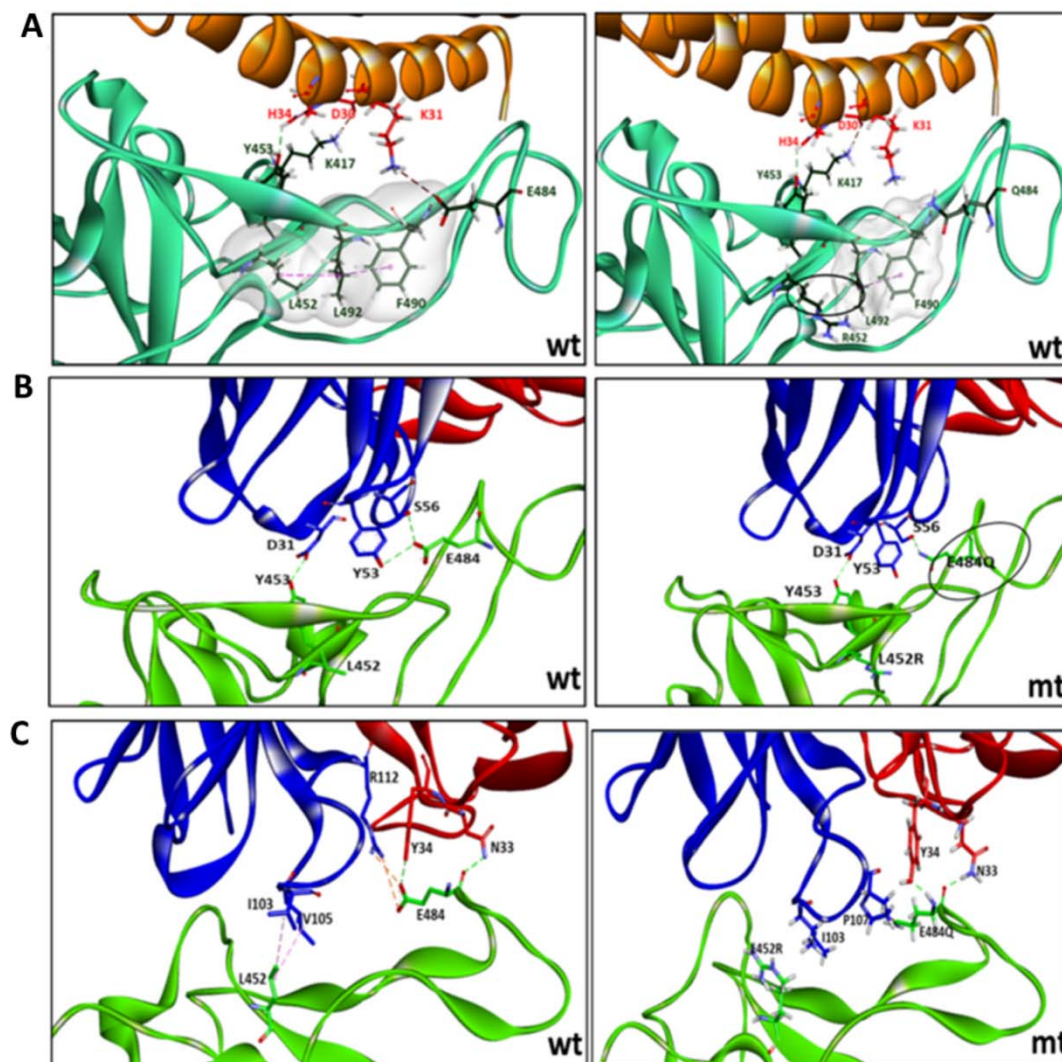



### **Legends to supplementary material:**

**Supplementary Figure 1:** The distribution of predominant PangoLIN lineages in the **labelled** districts of Maharashtra. The size of the pie charts is proportional to the number of genome sequences from the particular district.

**Supplementary Figure 2:** Structural complexes of RBD-ACE2 and RBD-Fab. **A.** RBD - ACE2 (PDB Id-6LZG), **B.** RBD - mAb REGN10933(PDB Id-6XDG) **C.** RBD - mAb P2B-2F6(7bwj)

**Supplementary Table 1:** List and details of whole genome sequences used in the study

**Supplementary Table2:** Intra and inter-molecular interactions of wild and mutant spike RBD of SARS-CoV-2 with ACE2. The bonds that are highlighted indicate those that are disrupted in the mutant strain

**Supplementary Table3:** Intermolecular interaction of neutralizing antibodies with wild and mutant spike RBD of SARS-CoV-2

### **Supplementary Material**

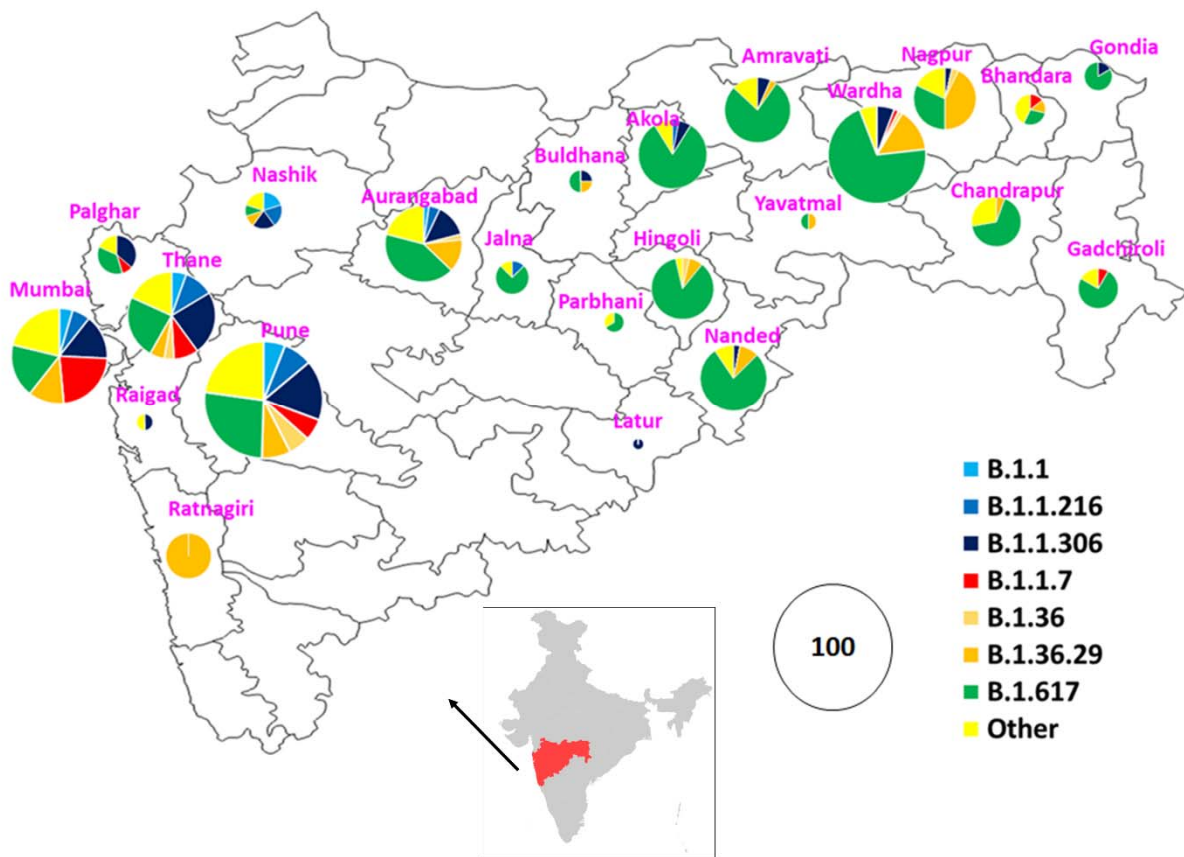

**Figure S1:** The distribution of predominant PangoLIN lineages in the labelled districts of Maharashtra. The size of the pie charts is proportional to the number of genome sequences from the particular district.

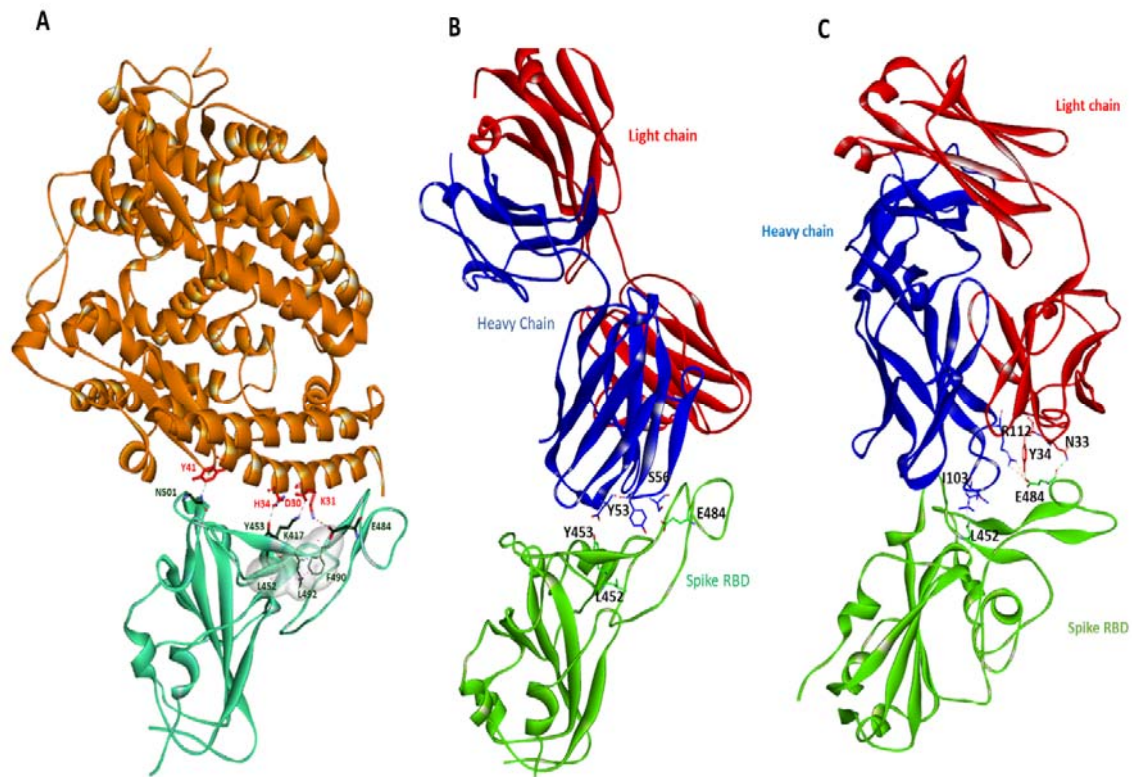

**Figure S2:** Structural complexes of RBD-ACE2 and RBD-Fab. **A.** RBD - ACE2 (PDB Id-6LZG), **B.** RBD - mAb REGN10933(PDB Id-6XDG) **C.** RBD - mAb P2B-2F6(7bwj)

**Supplementary Table 1:** List and details of whole genome sequences used in the study

| <b>SAMPLE_ID</b>                                | <b>Sample</b> | <b>State</b> | <b>District</b> | <b>Month</b> | <b>Lineage</b> |
|-------------------------------------------------|---------------|--------------|-----------------|--------------|----------------|
| RNA-3540 Maharashtra Ratnagiri Feb-21 B.1.36.29 | RNA-3540      | Maharashtra  | Ratnagiri       | Feb-21       | B.1.36.29      |
| RNA-3547 Maharashtra Buldhana Aug-20 B.1.36.29  | RNA-3547      | Maharashtra  | Buldhana        | Aug-20       | B.1.36.29      |
| RNA-3560 Maharashtra Nagpur Feb-21 B.1.596      | RNA-3560      | Maharashtra  | Nagpur          | Feb-21       | B.1.596        |
| RNA-3584 Maharashtra Wardha Aug-20 B.1.1.306    | RNA-3584      | Maharashtra  | Wardha          | Aug-20       | B.1.1.306      |
| RNA-3586 Maharashtra Mumbai B.1                 | RNA-3586      | Maharashtra  | Mumbai          | #N/A         | B.1            |
| RNA-3542 Maharashtra Ratnagiri Feb-21 B.1.36.29 | RNA-3542      | Maharashtra  | Ratnagiri       | Feb-21       | B.1.36.29      |
| RNA-3449 Maharashtra Mumbai Feb-21 B.1.1.7      | RNA-3449      | Maharashtra  | Mumbai          | Feb-21       | B.1.1.7        |
| RNA-3459 Maharashtra Mumbai Feb-21 B.1.1.7      | RNA-3459      | Maharashtra  | Mumbai          | Feb-21       | B.1.1.7        |
| RNA-3465 Maharashtra Mumbai Feb-21 B.1.1.7      | RNA-3465      | Maharashtra  | Mumbai          | Feb-21       | B.1.1.7        |
| RNA-3455 Maharashtra Mumbai Feb-21 B.1.1.7      | RNA-3455      | Maharashtra  | Mumbai          | Feb-21       | B.1.1.7        |
| RNA-3462 Maharashtra Mumbai Jan-21 B.1.1.7      | RNA-3462      | Maharashtra  | Mumbai          | Jan-21       | B.1.1.7        |
| RNA-3458 Maharashtra Mumbai Feb-21 B.1.1.7      | RNA-3458      | Maharashtra  | Mumbai          | Feb-21       | B.1.1.7        |
| RNA-3461 Maharashtra Mumbai Dec-20 B.1.1.7      | RNA-3461      | Maharashtra  | Mumbai          | Dec-20       | B.1.1.7        |
| RNA-3463 Maharashtra Mumbai Feb-21 B.1.1.7      | RNA-3463      | Maharashtra  | Mumbai          | Feb-21       | B.1.1.7        |
| RNA-                                            | RNA-          | Maharashtra  | Mumbai          | Jan-21       | B.1.1.7        |

|                                              |          |                 |          |        |         |
|----------------------------------------------|----------|-----------------|----------|--------|---------|
| 3472 Maharashtra Mumbai Jan-21 B.1.1.7       | 3472     | ra              |          |        |         |
| RNA-3483 Maharashtra Mumbai Jan-21 B.1.1.7   | RNA-3483 | Maharasht<br>ra | Mumbai   | Jan-21 | B.1.1.7 |
| RNA-3567 Maharashtra Wardha Feb-21 B.1.617   | RNA-3567 | Maharasht<br>ra | Wardha   | Feb-21 | B.1.617 |
| RNA-3545 Maharashtra Buldhana Feb-21 B.1.617 | RNA-3545 | Maharasht<br>ra | Buldhana | Feb-21 | B.1.617 |
| RNA-3551 Maharashtra Buldhana Feb-21 B.1.617 | RNA-3551 | Maharasht<br>ra | Buldhana | Feb-21 | B.1.617 |
| RNA-3556 Maharashtra Nagpur Feb-21 B.1.617   | RNA-3556 | Maharasht<br>ra | Nagpur   | Feb-21 | B.1.617 |
| RNA-3555 Maharashtra Nagpur Feb-21 B.1.617   | RNA-3555 | Maharasht<br>ra | Nagpur   | Feb-21 | B.1.617 |
| RNA-3577 Maharashtra Wardha Feb-21 B.1.617   | RNA-3577 | Maharasht<br>ra | Wardha   | Feb-21 | B.1.617 |
| RNA-3563 Maharashtra Nagpur Feb-21 B.1.617   | RNA-3563 | Maharasht<br>ra | Nagpur   | Feb-21 | B.1.617 |
| RNA-3573 Maharashtra Wardha Feb-21 B.1.617   | RNA-3573 | Maharasht<br>ra | Wardha   | Feb-21 | B.1.617 |
| RNA-3571 Maharashtra Wardha Feb-21 B.1.617   | RNA-3571 | Maharasht<br>ra | Wardha   | Feb-21 | B.1.617 |
| RNA-3565 Maharashtra Wardha Feb-21 B.1.617   | RNA-3565 | Maharasht<br>ra | Wardha   | Feb-21 | B.1.617 |
| RNA-3570 Maharashtra Wardha Feb-21 B.1.617   | RNA-3570 | Maharasht<br>ra | Wardha   | Feb-21 | B.1.617 |
| RNA-3568 Maharashtra Wardha Feb-21 B.1.617   | RNA-3568 | Maharasht<br>ra | Wardha   | Feb-21 | B.1.617 |
| RNA-3569 Maharashtra Wardha Feb-21 B.1.617   | RNA-3569 | Maharasht<br>ra | Wardha   | Feb-21 | B.1.617 |
| RNA-3521 Maharashtra Nashik Feb-             | RNA-3521 | Maharasht<br>ra | Nashik   | Feb-21 | B.1.617 |

|                                                 |          |             |           |        |           |
|-------------------------------------------------|----------|-------------|-----------|--------|-----------|
| 21 B.1.617                                      |          |             |           |        |           |
| RNA-3575 Maharashtra Wardha Feb-21 B.1.617      | RNA-3575 | Maharashtra | Wardha    | Feb-21 | B.1.617   |
| RNA-3554 Maharashtra Buldhana Feb-21 B.1.36.29  | RNA-3554 | Maharashtra | Buldhana  | Feb-21 | B.1.36.29 |
| RNA-3527 Maharashtra Ratnagiri Feb-21 B.1.36.29 | RNA-3527 | Maharashtra | Ratnagiri | Feb-21 | B.1.36.29 |
| RNA-3535 Maharashtra Ratnagiri Feb-21 B.1.36.29 | RNA-3535 | Maharashtra | Ratnagiri | Feb-21 | B.1.36.29 |
| RNA-3529 Maharashtra Ratnagiri Feb-21 B.1.36.29 | RNA-3529 | Maharashtra | Ratnagiri | Feb-21 | B.1.36.29 |
| RNA-3528 Maharashtra Ratnagiri Feb-21 B.1.36.29 | RNA-3528 | Maharashtra | Ratnagiri | Feb-21 | B.1.36.29 |
| RNA-3544 Maharashtra Ratnagiri Feb-21 B.1.36.29 | RNA-3544 | Maharashtra | Ratnagiri | Feb-21 | B.1.36.29 |
| RNA-3536 Maharashtra Ratnagiri Feb-21 B.1.36.29 | RNA-3536 | Maharashtra | Ratnagiri | Feb-21 | B.1.36.29 |
| RNA-3541 Maharashtra Ratnagiri Feb-21 B.1.36.29 | RNA-3541 | Maharashtra | Ratnagiri | Feb-21 | B.1.36.29 |
| RNA-3532 Maharashtra Ratnagiri Feb-21 B.1.36.29 | RNA-3532 | Maharashtra | Ratnagiri | Feb-21 | B.1.36.29 |
| RNA-3537 Maharashtra Ratnagiri Feb-21 B.1.36.29 | RNA-3537 | Maharashtra | Ratnagiri | Feb-21 | B.1.36.29 |
| RNA-3531 Maharashtra Ratnagiri Feb-21 B.1.36.29 | RNA-3531 | Maharashtra | Ratnagiri | Feb-21 | B.1.36.29 |
| RNA-3533 Maharashtra Ratnagiri Feb-21 B.1.36.29 | RNA-3533 | Maharashtra | Ratnagiri | Feb-21 | B.1.36.29 |
| RNA-3534 Maharashtra Ratnagiri Feb-21 B.1.36.29 | RNA-3534 | Maharashtra | Ratnagiri | Feb-21 | B.1.36.29 |
| RNA-3538 Maharashtra Ratnagiri Feb-21 B.1.36.29 | RNA-3538 | Maharashtra | Ratnagiri | Feb-21 | B.1.36.29 |

|                                                |          |             |          |        |           |
|------------------------------------------------|----------|-------------|----------|--------|-----------|
| RNA-3445 Maharashtra Mumbai Feb-21 B.1.525     | RNA-3445 | Maharashtra | Mumbai   | Feb-21 | B.1.525   |
| RNA-3523 Maharashtra Nashik Feb-21 B.1.1.306   | RNA-3523 | Maharashtra | Nashik   | Feb-21 | B.1.1.306 |
| RNA-3512 Maharashtra Nashik Feb-21 B.1.36.29   | RNA-3512 | Maharashtra | Nashik   | Feb-21 | B.1.36.29 |
| RNA-3582 Maharashtra Wardha Feb-21 B.1.36.29   | RNA-3582 | Maharashtra | Wardha   | Feb-21 | B.1.36.29 |
| RNA-3576 Maharashtra Wardha Feb-21 B.1.36.29   | RNA-3576 | Maharashtra | Wardha   | Feb-21 | B.1.36.29 |
| RNA-3557 Maharashtra Nagpur Feb-21 B.1.36.29   | RNA-3557 | Maharashtra | Nagpur   | Feb-21 | B.1.36.29 |
| RNA-3558 Maharashtra Nagpur Feb-21 B.1.36.29   | RNA-3558 | Maharashtra | Nagpur   | Feb-21 | B.1.36.29 |
| RNA-3507 Maharashtra Nashik Feb-21 B.1.1.316   | RNA-3507 | Maharashtra | Nashik   | Feb-21 | B.1.1.316 |
| RNA-3505 Maharashtra Pune Feb-21 B.1.36.22     | RNA-3505 | Maharashtra | Pune     | Feb-21 | B.1.36.22 |
| RNA-3550 Maharashtra Buldhana Feb-21 B.1.1.306 | RNA-3550 | Maharashtra | Buldhana | Feb-21 | B.1.1.306 |
| RNA-3509 Maharashtra Nashik Feb-21 B.1.1.306   | RNA-3509 | Maharashtra | Nashik   | Feb-21 | B.1.1.306 |
| RNA-3513 Maharashtra Nashik Feb-21 B.1.36.24   | RNA-3513 | Maharashtra | Nashik   | Feb-21 | B.1.36.24 |
| RNA-3506 Maharashtra Pune Feb-21 B.1.1.216     | RNA-3506 | Maharashtra | Pune     | Feb-21 | B.1.1.216 |
| VOC-38 Maharashtra Nagpur Dec-20 B.1.36.29     | VOC-38   | Maharashtra | Nagpur   | Dec-20 | B.1.36.29 |
| VOC-39 Maharashtra Nagpur Dec-20 B.1.36.29     | VOC-39   | Maharashtra | Nagpur   | Dec-20 | B.1.36.29 |
| VOC-112 Maharashtra Mumbai Dec-20 B.1.1.7      | VOC-112  | Maharashtra | Mumbai   | Dec-20 | B.1.1.7   |
| VOC-66 Maharashtra Mumbai Dec-                 | VOC-66   | Maharashtra | Mumbai   | Dec-20 | B.1.1.7   |

|                                                |                 |             |        |        |            |
|------------------------------------------------|-----------------|-------------|--------|--------|------------|
| 20 B.1.1.7                                     |                 |             |        |        |            |
| VOC-70 Maharashtra Mumbai Dec-20 B.1.1.7       | VOC-70          | Maharashtra | Mumbai | Dec-20 | B.1.1.7    |
| VOC-7 Maharashtra Pune Dec-20 B.1.1.7          | VOC-7           | Maharashtra | Pune   | Dec-20 | B.1.1.7    |
| VOC-65 Maharashtra Mumbai Dec-20 B.1.1.7       | VOC-65          | Maharashtra | Mumbai | Dec-20 | B.1.1.7    |
| VOC-84 Maharashtra NA Dec-20 B.1.1.7           | VOC-84          | Maharashtra | NA     | Dec-20 | B.1.1.7    |
| VOC-49 Maharashtra Nashik Dec-20 B.1.1         | VOC-49          | Maharashtra | Nashik | Dec-20 | B.1.1      |
| VOC-114 Maharashtra Mumbai Dec-20 B.1.160      | VOC-114         | Maharashtra | Mumbai | Dec-20 | B.1.160    |
| VOC-82 Maharashtra NA Dec-20 B.1.1.306         | VOC-82          | Maharashtra | NA     | Dec-20 | B.1.1.306  |
| VOC-37 Maharashtra Pune Dec-20 B.1.177.81      | VOC-37          | Maharashtra | Pune   | Dec-20 | B.1.177.81 |
| VOC-120 Maharashtra Mumbai Dec-20 B.1.1.294    | VOC-120         | Maharashtra | Mumbai | Dec-20 | B.1.1.294  |
| VOC-75 Maharashtra Mumbai Dec-20 B.1.1.306     | VOC-75          | Maharashtra | Mumbai | Dec-20 | B.1.1.306  |
| VOC-106 Maharashtra Pune Dec-20 B.1.177.16     | VOC-106         | Maharashtra | Pune   | Dec-20 | B.1.177.16 |
| VOC-48 Maharashtra Nashik Dec-20 B.1.1.216     | VOC-48          | Maharashtra | Nashik | Dec-20 | B.1.1.216  |
| VOC-50 Maharashtra Nashik Dec-20 B.1.1.216     | VOC-50          | Maharashtra | Nashik | Dec-20 | B.1.1.216  |
| VOC-173 Maharashtra Pimpri Dec-20 B.1.1.7      | VOC-173         | Maharashtra | Pimpri | Dec-20 | B.1.1.7    |
| VOC-172 Maharashtra Pimpri Dec-20 B.1.1.7      | VOC-172         | Maharashtra | Pimpri | Dec-20 | B.1.1.7    |
| VOC-73 Maharashtra Mumbai Dec-20 B.1.524       | VOC-73          | Maharashtra | Mumbai | Dec-20 | B.1.524    |
| VOC-211 Maharashtra Thane Dec-20 B.1.36        | VOC-211         | Maharashtra | Thane  | Dec-20 | B.1.36     |
| 2019nCoV-286757 Maharashtra Pune Dec-20 B.1.36 | 2019nCoV-286757 | Maharashtra | Pune   | Dec-20 | B.1.36     |



|                                                   |                 |             |      |        |           |
|---------------------------------------------------|-----------------|-------------|------|--------|-----------|
| 2019nCoV-282393 Maharashtra Pune Dec-20 B.1.36.28 | 2019nCoV-282393 | Maharashtra | Pune | Dec-20 | B.1.36.28 |
| 2019nCoV-281734 Maharashtra Pune Dec-20 B.1.36.29 | 2019nCoV-281734 | Maharashtra | Pune | Dec-20 | B.1.36.29 |
| 2019nCoV-290248 Maharashtra Pune Jan-21 B.1.36.29 | 2019nCoV-290248 | Maharashtra | Pune | Jan-21 | B.1.36.29 |
| 2019nCoV-290257 Maharashtra Pune Jan-21 B.1.36.29 | 2019nCoV-290257 | Maharashtra | Pune | Jan-21 | B.1.36.29 |
| 2019nCoV-286687 Maharashtra Pune Dec-20 B.1.36.29 | 2019nCoV-286687 | Maharashtra | Pune | Dec-20 | B.1.36.29 |
| 2019nCoV-282387 Maharashtra Pune Dec-20 B.1.36.29 | 2019nCoV-282387 | Maharashtra | Pune | Dec-20 | B.1.36.29 |
| 2019nCoV-274033 Maharashtra Pune Dec-20 AE.3      | 2019nCoV-274033 | Maharashtra | Pune | Dec-20 | AE.3      |
| 2019nCoV-287775 Maharashtra Pune Dec-20 B.1.1.7   | 2019nCoV-287775 | Maharashtra | Pune | Dec-20 | B.1.1.7   |
| 2019nCoV-289128 Maharashtra Pune Jan-21 AE.3      | 2019nCoV-289128 | Maharashtra | Pune | Jan-21 | AE.3      |
| 2019nCoV-288840 Maharashtra Pune Jan-21 B.1.1     | 2019nCoV-288840 | Maharashtra | Pune | Jan-21 | B.1.1     |
| 2019nCoV-280822 Maharashtra Pune Dec-20 B.1.1.306 | 2019nCoV-280822 | Maharashtra | Pune | Dec-20 | B.1.1.306 |
| 2019nCoV-286036 Maharashtra Pune Dec-20 B.1.1.148 | 2019nCoV-286036 | Maharashtra | Pune | Dec-20 | B.1.1.148 |
| 2019nCoV-290239 Maharashtra Pune Jan-21 B.1.1.306 | 2019nCoV-290239 | Maharashtra | Pune | Jan-21 | B.1.1.306 |
| 2019nCoV-289435 Maharashtra Pune Jan-21 B.1.1.306 | 2019nCoV-289435 | Maharashtra | Pune | Jan-21 | B.1.1.306 |
| 2019nCoV-285164 Maharashtra Pune Dec-20 B.1.36.28 | 2019nCoV-285164 | Maharashtra | Pune | Dec-20 | B.1.36.28 |
| 2019nCoV-                                         | 2019nCoV-       | Maharashtra | Pune | Jan-21 | AE.3      |

|                                                   |                 |                 |      |        |  |           |
|---------------------------------------------------|-----------------|-----------------|------|--------|--|-----------|
| 289547 Maharashtra Pune Jan-21 AE.3               | V-289547        | ra              |      |        |  |           |
| 2019nCoV-285059 Maharashtra Pune Dec-20 B.1.36.9  | 2019nCoV-285059 | Maharasht<br>ra | Pune | Dec-20 |  | B.1.36.9  |
| 2019nCoV-276219 Maharashtra Pune Dec-20 B.1.1     | 2019nCoV-276219 | Maharasht<br>ra | Pune | Dec-20 |  | B.1.1     |
| 2019nCoV-281229 Maharashtra Pune Dec-20 B.1.36.28 | 2019nCoV-281229 | Maharasht<br>ra | Pune | Dec-20 |  | B.1.36.28 |
| 2019nCoV-282472 Maharashtra Pune Dec-20 B.1.1.303 | 2019nCoV-282472 | Maharasht<br>ra | Pune | Dec-20 |  | B.1.1.303 |
| 2019nCoV-289122 Maharashtra Pune Jan-21 B.1.1.306 | 2019nCoV-289122 | Maharasht<br>ra | Pune | Jan-21 |  | B.1.1.306 |
| 2019nCoV-274948 Maharashtra Pune Dec-20 B.1.36    | 2019nCoV-274948 | Maharasht<br>ra | Pune | Dec-20 |  | B.1.36    |
| 2019nCoV-282789 Maharashtra Pune Jan-21 AE.6      | 2019nCoV-282789 | Maharasht<br>ra | Pune | Jan-21 |  | AE.6      |
| 2019nCoV-276813 Maharashtra Pune Dec-20 B.1.1.216 | 2019nCoV-276813 | Maharasht<br>ra | Pune | Dec-20 |  | B.1.1.216 |
| 2019nCoV-286002 Maharashtra Pune Dec-20 B.1.1.306 | 2019nCoV-286002 | Maharasht<br>ra | Pune | Dec-20 |  | B.1.1.306 |
| 2019nCoV-284281 Maharashtra Pune Dec-20 B.1.1.216 | 2019nCoV-284281 | Maharasht<br>ra | Pune | Dec-20 |  | B.1.1.216 |
| 2019nCoV-275555 Maharashtra Pune Dec-20 B.1.1.306 | 2019nCoV-275555 | Maharasht<br>ra | Pune | Dec-20 |  | B.1.1.306 |
| 2019nCoV-274672 Maharashtra Pune Dec-20 B.1.1.216 | 2019nCoV-274672 | Maharasht<br>ra | Pune | Dec-20 |  | B.1.1.216 |
| 2019nCoV-285629 Maharashtra Pune Dec-20 B.1.1.306 | 2019nCoV-285629 | Maharasht<br>ra | Pune | Dec-20 |  | B.1.1.306 |
| 2019nCoV-280527 Maharashtra Pune Dec-20 B.1.36    | 2019nCoV-280527 | Maharasht<br>ra | Pune | Dec-20 |  | B.1.36    |
| 2019nCoV-283552 Maharashtra Pune Dec-             | 2019nCoV-283552 | Maharasht<br>ra | Pune | Dec-20 |  | B.1.36.28 |

|                                                   |                 |             |        |        |           |
|---------------------------------------------------|-----------------|-------------|--------|--------|-----------|
| 20 B.1.36.28                                      |                 |             |        |        |           |
| 2019nCoV-277854 Maharashtra Pune Dec-20 B.1.1.272 | 2019nCoV-277854 | Maharashtra | Pune   | Dec-20 | B.1.1.272 |
| 2019nCoV-282137 Maharashtra Pune Dec-20 B.1.1.306 | 2019nCoV-282137 | Maharashtra | Pune   | Dec-20 | B.1.1.306 |
| 2019nCoV-277925 Maharashtra Pune Dec-20 B.1.1.306 | 2019nCoV-277925 | Maharashtra | Pune   | Dec-20 | B.1.1.306 |
| 2019nCoV-273465 Maharashtra Pune Dec-20 B.1.1.306 | 2019nCoV-273465 | Maharashtra | Pune   | Dec-20 | B.1.1.306 |
| 2019nCoV-289130 Maharashtra Pune Jan-21 B.1.1.306 | 2019nCoV-289130 | Maharashtra | Pune   | Jan-21 | B.1.1.306 |
| 2019nCoV-277856 Maharashtra Pune Dec-20 B.1.1     | 2019nCoV-277856 | Maharashtra | Pune   | Dec-20 | B.1.1     |
| 2019nCoV-290266 Maharashtra Pune Jan-21 B.1.1     | 2019nCoV-290266 | Maharashtra | Pune   | Jan-21 | B.1.1     |
| 2019nCoV-276959 Maharashtra Pune Dec-20 B.1.1.216 | 2019nCoV-276959 | Maharashtra | Pune   | Dec-20 | B.1.1.216 |
| 2019nCoV-284488 Maharashtra Pune Dec-20 B.1.1     | 2019nCoV-284488 | Maharashtra | Pune   | Dec-20 | B.1.1     |
| 2019nCoV-280290 Maharashtra Pune Dec-20 B.1.1.216 | 2019nCoV-280290 | Maharashtra | Pune   | Dec-20 | B.1.1.216 |
| 2019nCoV-286132 Maharashtra Pune Dec-20 B.1.1.216 | 2019nCoV-286132 | Maharashtra | Pune   | Dec-20 | B.1.1.216 |
| VOC-227 Maharashtra Mumbai Dec-20 A.21            | VOC-227         | Maharashtra | Mumbai | Dec-20 | A.21      |
| VOC-288 Maharashtra Mumbai Dec-20 B.1.36.28       | VOC-288         | Maharashtra | Mumbai | Dec-20 | B.1.36.28 |
| SEQ-728 Maharashtra Nagpur Dec-20 B.1.36.29       | SEQ-728         | Maharashtra | Nagpur | Dec-20 | B.1.36.29 |
| SEQ-732 Maharashtra Nagpur Dec-20 B.1.36.29       | SEQ-732         | Maharashtra | Nagpur | Dec-20 | B.1.36.29 |

|                                                |         |             |            |        |            |
|------------------------------------------------|---------|-------------|------------|--------|------------|
| SEQ-740 Maharashtra Nagpur Dec-20 B.1          | SEQ-740 | Maharashtra | Nagpur     | Dec-20 | B.1        |
| SEQ-730 Maharashtra Nagpur Dec-20 B.1.36       | SEQ-730 | Maharashtra | Nagpur     | Dec-20 | B.1.36     |
| SEQ-734 Maharashtra Nagpur Dec-20 B.1.36.8     | SEQ-734 | Maharashtra | Nagpur     | Dec-20 | B.1.36.8   |
| VOC-86 Maharashtra Thane Dec-20 B.1.1.45       | VOC-86  | Maharashtra | Thane      | Dec-20 | B.1.1.45   |
| VOC-41 Maharashtra Nagpur Dec-20 B.1.36.29     | VOC-41  | Maharashtra | Nagpur     | Dec-20 | B.1.36.29  |
| VOC-68 Maharashtra Mumbai Dec-20 B.1.36.29     | VOC-68  | Maharashtra | Mumbai     | Dec-20 | B.1.36.29  |
| VOC-40 Maharashtra Nagpur Dec-20 B.1.36.29     | VOC-40  | Maharashtra | Nagpur     | Dec-20 | B.1.36.29  |
| VOC-42 Maharashtra Nagpur Dec-20 B.1.36.29     | VOC-42  | Maharashtra | Nagpur     | Dec-20 | B.1.36.29  |
| VOC-72 Maharashtra Mumbai Dec-20 B.1.36.29     | VOC-72  | Maharashtra | Mumbai     | Dec-20 | B.1.36.29  |
| VOC-36 Maharashtra Mumbai Dec-20 B.1.36.29     | VOC-36  | Maharashtra | Mumbai     | Dec-20 | B.1.36.29  |
| VOC-117 Maharashtra Mumbai Dec-20 B.1.36.29    | VOC-117 | Maharashtra | Mumbai     | Dec-20 | B.1.36.29  |
| VOC-67 Maharashtra Mumbai Dec-20 B.1.36.29     | VOC-67  | Maharashtra | Mumbai     | Dec-20 | B.1.36.29  |
| VOC-92 Maharashtra Aurangabad Dec-20 B.1.1.306 | VOC-92  | Maharashtra | Aurangabad | Dec-20 | B.1.1.306  |
| VOC-85 Maharashtra Thane Dec-20 B.1.36.8       | VOC-85  | Maharashtra | Thane      | Dec-20 | B.1.36.8   |
| VOC-119 Maharashtra Mumbai Dec-20 B.1.1.216    | VOC-119 | Maharashtra | Mumbai     | Dec-20 | B.1.1.216  |
| VOC-113 Maharashtra Mumbai Dec-20 B.1.177.16   | VOC-113 | Maharashtra | Mumbai     | Dec-20 | B.1.177.16 |
| VOC-47 Maharashtra Nashik Dec-20 B.1.1         | VOC-47  | Maharashtra | Nashik     | Dec-20 | B.1.1      |
| VOC-137 Maharashtra Thane Dec-                 | VOC-137 | Maharashtra | Thane      | Dec-   | B.1.1.216  |

|                                             |          |                 |        |        |           |
|---------------------------------------------|----------|-----------------|--------|--------|-----------|
| 20 B.1.1.216                                |          | ra              |        | 20     |           |
| VOC-138 Maharashtra Thane Dec-20 B.1.1.216  | VOC-138  | Maharasht<br>ra | Thane  | Dec-20 | B.1.1.216 |
| VOC-171 Maharashtra Pune Dec-20 B.1.1.7     | VOC-171  | Maharasht<br>ra | Pune   | Dec-20 | B.1.1.7   |
| VOC-170 Maharashtra Pune Dec-20 B.1.128     | VOC-170  | Maharasht<br>ra | Pune   | Dec-20 | B.1.128   |
| VOC-370 Maharashtra Mumbai Feb-21 B.1.1.59  | VOC-370  | Maharasht<br>ra | Mumbai | Feb-21 | B.1.1.59  |
| VOC-336 Maharashtra Mumbai Jan-21 B.1.1.306 | VOC-336  | Maharasht<br>ra | Mumbai | Jan-21 | B.1.1.306 |
| VOC-369 Maharashtra Thane Jan-21 B.1.1      | VOC-369  | Maharasht<br>ra | Thane  | Jan-21 | B.1.1     |
| VOC-331 Maharashtra Mumbai Jan-21 B.1.1.216 | VOC-331  | Maharasht<br>ra | Mumbai | Jan-21 | B.1.1.216 |
| GSEQ-117 Maharashtra Pune Feb-21 B.1.617    | GSEQ-117 | Maharasht<br>ra | Pune   | Feb-21 | B.1.617   |
| GSEQ-116 Maharashtra Pune Feb-21 B.1.617    | GSEQ-116 | Maharasht<br>ra | Pune   | Feb-21 | B.1.617   |
| GSEQ-127 Maharashtra Pune Feb-21 B.1.617    | GSEQ-127 | Maharasht<br>ra | Pune   | Feb-21 | B.1.617   |
| GSEQ-18 Maharashtra Akola Jan-21 B.1.617    | GSEQ-18  | Maharasht<br>ra | Akola  | Jan-21 | B.1.617   |
| GSEQ-134 Maharashtra Pune Feb-21 B.1.617    | GSEQ-134 | Maharasht<br>ra | Pune   | Feb-21 | B.1.617   |
| GSEQ-144 Maharashtra Pune Feb-21 B.1.617    | GSEQ-144 | Maharasht<br>ra | Pune   | Feb-21 | B.1.617   |
| GSEQ-142 Maharashtra Pune Feb-21 B.1        | GSEQ-142 | Maharasht<br>ra | Pune   | Feb-21 | B.1       |
| GSEQ-143 Maharashtra Pune Feb-21 B.1.617    | GSEQ-143 | Maharasht<br>ra | Pune   | Feb-21 | B.1.617   |
| GSEQ-76 Maharashtra Akola Feb-21 B.1.617    | GSEQ-76  | Maharasht<br>ra | Akola  | Feb-21 | B.1.617   |
| GSEQ-119 Maharashtra Pune Feb-21 B.1.617    | GSEQ-119 | Maharasht<br>ra | Pune   | Feb-21 | B.1.617   |
| GSEQ-33 Maharashtra Akola Feb-21 B.1.617    | GSEQ-33  | Maharasht<br>ra | Akola  | Feb-21 | B.1.617   |
| GSEQ-35 Maharashtra Akola Feb-21 B.1.617    | GSEQ-35  | Maharasht<br>ra | Akola  | Feb-21 | B.1.617   |
| GSEQ-69 Maharashtra Akola Feb-21 B.1.617    | GSEQ-69  | Maharasht<br>ra | Akola  | Feb-21 | B.1.617   |
| GSEQ-30 Maharashtra Akola Feb-              | GSEQ-30  | Maharasht       | Akola  | Feb-   | B.1.617   |

|                                            |          |                 |       |        |           |
|--------------------------------------------|----------|-----------------|-------|--------|-----------|
| 21 B.1.617                                 |          | ra              |       | 21     |           |
| GSEQ-128 Maharashtra Pune Feb-21 B.1.617   | GSEQ-128 | Maharasht<br>ra | Pune  | Feb-21 | B.1.617   |
| GSEQ-63 Maharashtra Akola Feb-21 B.1.617   | GSEQ-63  | Maharasht<br>ra | Akola | Feb-21 | B.1.617   |
| GSEQ-56 Maharashtra Akola Feb-21 B.1.617   | GSEQ-56  | Maharasht<br>ra | Akola | Feb-21 | B.1.617   |
| GSEQ-66 Maharashtra Akola Feb-21 B.1.617   | GSEQ-66  | Maharasht<br>ra | Akola | Feb-21 | B.1.617   |
| GSEQ-10 Maharashtra Akola Feb-21 B.1       | GSEQ-10  | Maharasht<br>ra | Akola | Feb-21 | B.1       |
| GSEQ-31 Maharashtra Akola Feb-21 B.1.617   | GSEQ-31  | Maharasht<br>ra | Akola | Feb-21 | B.1.617   |
| GSEQ-25 Maharashtra Akola Feb-21 B.1.617   | GSEQ-25  | Maharasht<br>ra | Akola | Feb-21 | B.1.617   |
| GSEQ-38 Maharashtra Akola Feb-21 B.1.617   | GSEQ-38  | Maharasht<br>ra | Akola | Feb-21 | B.1.617   |
| GSEQ-14 Maharashtra Akola Jan-21 B.1.617   | GSEQ-14  | Maharasht<br>ra | Akola | Jan-21 | B.1.617   |
| GSEQ-20 Maharashtra Akola Feb-21 B.1.617   | GSEQ-20  | Maharasht<br>ra | Akola | Feb-21 | B.1.617   |
| GSEQ-39 Maharashtra Akola Feb-21 B.1.617   | GSEQ-39  | Maharasht<br>ra | Akola | Feb-21 | B.1.617   |
| GSEQ-34 Maharashtra Akola Feb-21 B.1.617   | GSEQ-34  | Maharasht<br>ra | Akola | Feb-21 | B.1.617   |
| GSEQ-8 Maharashtra Akola Feb-21 B.1.617    | GSEQ-8   | Maharasht<br>ra | Akola | Feb-21 | B.1.617   |
| GSEQ-36 Maharashtra Akola Feb-21 B.1.617   | GSEQ-36  | Maharasht<br>ra | Akola | Feb-21 | B.1.617   |
| GSEQ-123 Maharashtra Pune Feb-21 B.1.36.29 | GSEQ-123 | Maharasht<br>ra | Pune  | Feb-21 | B.1.36.29 |
| GSEQ-136 Maharashtra Pune Feb-21 B.1       | GSEQ-136 | Maharasht<br>ra | Pune  | Feb-21 | B.1       |
| GSEQ-41 Maharashtra Akola Feb-21 B.1.1.335 | GSEQ-41  | Maharasht<br>ra | Akola | Feb-21 | B.1.1.335 |
| GSEQ-15 Maharashtra Akola Jan-21 B.1.1.303 | GSEQ-15  | Maharasht<br>ra | Akola | Jan-21 | B.1.1.303 |
| GSEQ-131 Maharashtra Pune Feb-21 A.21      | GSEQ-131 | Maharasht<br>ra | Pune  | Feb-21 | A.21      |
| GSEQ-120 Maharashtra Pune Feb-21 B.1.1.306 | GSEQ-120 | Maharasht<br>ra | Pune  | Feb-21 | B.1.1.306 |
| GSEQ-115 Maharashtra Pune Feb-21 B.1.1.306 | GSEQ-115 | Maharasht<br>ra | Pune  | Feb-21 | B.1.1.306 |
| GSEQ-122 Maharashtra Pune Feb-21 B.1.1.306 | GSEQ-122 | Maharasht<br>ra | Pune  | Feb-21 | B.1.1.306 |

|                                            |          |                 |       |        |           |
|--------------------------------------------|----------|-----------------|-------|--------|-----------|
| GSEQ-57 Maharashtra Akola Feb-21 B.1.1.216 | GSEQ-57  | Maharasht<br>ra | Akola | Feb-21 | B.1.1.216 |
| GSEQ-114 Maharashtra Pune Feb-21 B.1.36    | GSEQ-114 | Maharasht<br>ra | Pune  | Feb-21 | B.1.36    |
| GSEQ-46 Maharashtra Akola Feb-21 B.1.1.306 | GSEQ-46  | Maharasht<br>ra | Akola | Feb-21 | B.1.1.306 |
| GSEQ-137 Maharashtra Pune Feb-21 B.1.36.22 | GSEQ-137 | Maharasht<br>ra | Pune  | Feb-21 | B.1.36.22 |
| GSEQ-126 Maharashtra Pune Feb-21 B.1.36    | GSEQ-126 | Maharasht<br>ra | Pune  | Feb-21 | B.1.36    |
| GSEQ-111 Maharashtra Pune Feb-21 B.1.1.216 | GSEQ-111 | Maharasht<br>ra | Pune  | Feb-21 | B.1.1.216 |
| GSEQ-23 Maharashtra Akola Feb-21 B.1.617   | GSEQ-23  | Maharasht<br>ra | Akola | Feb-21 | B.1.617   |
| GSEQ-141 Maharashtra Pune Feb-21 B.1.617   | GSEQ-141 | Maharasht<br>ra | Pune  | Feb-21 | B.1.617   |
| GSEQ-145 Maharashtra Pune Feb-21 B.1.617   | GSEQ-145 | Maharasht<br>ra | Pune  | Feb-21 | B.1.617   |
| GSEQ-37 Maharashtra Akola Feb-21 B.1.617   | GSEQ-37  | Maharasht<br>ra | Akola | Feb-21 | B.1.617   |
| GSEQ-113 Maharashtra Pune Feb-21 B.1.617   | GSEQ-113 | Maharasht<br>ra | Pune  | Feb-21 | B.1.617   |
| GSEQ-130 Maharashtra Pune Feb-21 B.1.617   | GSEQ-130 | Maharasht<br>ra | Pune  | Feb-21 | B.1.617   |
| GSEQ-11 Maharashtra Akola Feb-21 B.1.617   | GSEQ-11  | Maharasht<br>ra | Akola | Feb-21 | B.1.617   |
| GSEQ-47 Maharashtra Akola Feb-21 B.1.617   | GSEQ-47  | Maharasht<br>ra | Akola | Feb-21 | B.1.617   |
| GSEQ-13 Maharashtra Akola Feb-21 B.1.617   | GSEQ-13  | Maharasht<br>ra | Akola | Feb-21 | B.1.617   |
| GSEQ-81 Maharashtra Akola Feb-21 B.1.617   | GSEQ-81  | Maharasht<br>ra | Akola | Feb-21 | B.1.617   |
| GSEQ-32 Maharashtra Akola Feb-21 B.1.617   | GSEQ-32  | Maharasht<br>ra | Akola | Feb-21 | B.1.617   |
| GSEQ-16 Maharashtra Akola Jan-21 B.1.617   | GSEQ-16  | Maharasht<br>ra | Akola | Jan-21 | B.1.617   |
| GSEQ-24 Maharashtra Akola Feb-21 B.1.617   | GSEQ-24  | Maharasht<br>ra | Akola | Feb-21 | B.1.617   |
| GSEQ-55 Maharashtra Akola Feb-21 B.1.617   | GSEQ-55  | Maharasht<br>ra | Akola | Feb-21 | B.1.617   |
| GSEQ-133 Maharashtra Pune Feb-21 B.1.1.306 | GSEQ-133 | Maharasht<br>ra | Pune  | Feb-21 | B.1.1.306 |
| GSEQ-140 Maharashtra Pune Feb-21 B.1.36    | GSEQ-140 | Maharasht<br>ra | Pune  | Feb-21 | B.1.36    |
| GSEQ-112 Maharashtra Pune Feb-21 B.1.1.306 | GSEQ-112 | Maharasht<br>ra | Pune  | Feb-21 | B.1.1.306 |

|                                                |          |                 |            |        |           |
|------------------------------------------------|----------|-----------------|------------|--------|-----------|
| GSEQ-67 Maharashtra Akola Feb-21 B.1.1.306     | GSEQ-67  | Maharasht<br>ra | Akola      | Feb-21 | B.1.1.306 |
| GSEQ-125 Maharashtra Pune Feb-21 B.1.1.326     | GSEQ-125 | Maharasht<br>ra | Pune       | Feb-21 | B.1.1.326 |
| GSEQ-201 Maharashtra Amravati Feb-21 B.1       | GSEQ-201 | Maharasht<br>ra | Amravati   | Feb-21 | B.1       |
| GSEQ-255 Maharashtra Nagpur Feb-21 B.1.596     | GSEQ-255 | Maharasht<br>ra | Nagpur     | Feb-21 | B.1.596   |
| GSEQ-267 Maharashtra Aurangabad Feb-21 B.1.596 | GSEQ-267 | Maharasht<br>ra | Aurangabad | Feb-21 | B.1.596   |
| GSEQ-224 Maharashtra Amravati Feb-21 B.1.617   | GSEQ-224 | Maharasht<br>ra | Amravati   | Feb-21 | B.1.617   |
| GSEQ-246 Maharashtra Amravati Feb-21 B.1.617   | GSEQ-246 | Maharasht<br>ra | Amravati   | Feb-21 | B.1.617   |
| GSEQ-257 Maharashtra Nagpur Feb-21 B.1.617     | GSEQ-257 | Maharasht<br>ra | Nagpur     | Feb-21 | B.1.617   |
| GSEQ-244 Maharashtra Amravati Feb-21 B.1.617   | GSEQ-244 | Maharasht<br>ra | Amravati   | Feb-21 | B.1.617   |
| GSEQ-251 Maharashtra Nagpur Feb-21 B.1.617     | GSEQ-251 | Maharasht<br>ra | Nagpur     | Feb-21 | B.1.617   |
| GSEQ-243 Maharashtra Amravati Feb-21 B.1.617   | GSEQ-243 | Maharasht<br>ra | Amravati   | Feb-21 | B.1.617   |
| GSEQ-248 Maharashtra Amravati Feb-21 B.1.617   | GSEQ-248 | Maharasht<br>ra | Amravati   | Feb-21 | B.1.617   |
| GSEQ-208 Maharashtra Amravati Feb-21 B.1.617   | GSEQ-208 | Maharasht<br>ra | Amravati   | Feb-21 | B.1.617   |
| GSEQ-250 Maharashtra Nagpur Feb-21 B.1.617     | GSEQ-250 | Maharasht<br>ra | Nagpur     | Feb-21 | B.1.617   |
| GSEQ-222 Maharashtra Amravati Feb-21 B.1       | GSEQ-222 | Maharasht<br>ra | Amravati   | Feb-21 | B.1       |
| GSEQ-216 Maharashtra Amravati Feb-21 B.1.617   | GSEQ-216 | Maharasht<br>ra | Amravati   | Feb-21 | B.1.617   |



|                                              |          |             |          |        |         |
|----------------------------------------------|----------|-------------|----------|--------|---------|
| GSEQ-211 Maharashtra Amravati Feb-21 B.1.617 | GSEQ-211 | Maharashtra | Amravati | Feb-21 | B.1.617 |
| GSEQ-199 Maharashtra Pune Feb-21 B.1.335     | GSEQ-199 | Maharashtra | Pune     | Feb-21 | B.1.335 |
| GSEQ-205 Maharashtra Amravati Feb-21 B.1.617 | GSEQ-205 | Maharashtra | Amravati | Feb-21 | B.1.617 |
| GSEQ-213 Maharashtra Amravati Feb-21 B.1.617 | GSEQ-213 | Maharashtra | Amravati | Feb-21 | B.1.617 |
| GSEQ-228 Maharashtra Amravati Feb-21 B.1.128 | GSEQ-228 | Maharashtra | Amravati | Feb-21 | B.1.128 |
| GSEQ-242 Maharashtra Amravati Feb-21 B.1.617 | GSEQ-242 | Maharashtra | Amravati | Feb-21 | B.1.617 |
| GSEQ-202 Maharashtra Amravati Feb-21 B.1.617 | GSEQ-202 | Maharashtra | Amravati | Feb-21 | B.1.617 |
| GSEQ-227 Maharashtra Amravati Feb-21 B.1.617 | GSEQ-227 | Maharashtra | Amravati | Feb-21 | B.1.617 |
| GSEQ-258 Maharashtra Nagpur Feb-21 B.1.617   | GSEQ-258 | Maharashtra | Nagpur   | Feb-21 | B.1.617 |
| GSEQ-238 Maharashtra Amravati Feb-21 B.1.617 | GSEQ-238 | Maharashtra | Amravati | Feb-21 | B.1.617 |
| GSEQ-249 Maharashtra Amravati Feb-21 B.1.617 | GSEQ-249 | Maharashtra | Amravati | Feb-21 | B.1.617 |
| GSEQ-204 Maharashtra Amravati Feb-21 B.1.617 | GSEQ-204 | Maharashtra | Amravati | Feb-21 | B.1.617 |
| GSEQ-237 Maharashtra Amravati Feb-21 B.1.617 | GSEQ-237 | Maharashtra | Amravati | Feb-21 | B.1.617 |
| GSEQ-209 Maharashtra Amravati Feb-21 B.1.617 | GSEQ-209 | Maharashtra | Amravati | Feb-21 | B.1.617 |
| GSEQ-233 Maharashtra Amravati Feb-21 B.1.617 | GSEQ-233 | Maharashtra | Amravati | Feb-21 | B.1.617 |
| GSEQ-234 Maharashtra Amravati Feb-           | GSEQ-234 | Maharashtra | Amravati | Feb-21 | B.1.617 |

|                                                  |          |             |            |        |           |
|--------------------------------------------------|----------|-------------|------------|--------|-----------|
| 21 B.1.617                                       |          |             |            |        |           |
| GSEQ-236 Maharashtra Amravati Feb-21 B.1.617     | GSEQ-236 | Maharashtra | Amravati   | Feb-21 | B.1.617   |
| GSEQ-203 Maharashtra Amravati Feb-21 B.1.617     | GSEQ-203 | Maharashtra | Amravati   | Feb-21 | B.1.617   |
| GSEQ-259 Maharashtra Nagpur Feb-21 B.1.617       | GSEQ-259 | Maharashtra | Nagpur     | Feb-21 | B.1.617   |
| GSEQ-212 Maharashtra Amravati Feb-21 B.1.617     | GSEQ-212 | Maharashtra | Amravati   | Feb-21 | B.1.617   |
| GSEQ-247 Maharashtra Amravati Feb-21 B.1.617     | GSEQ-247 | Maharashtra | Amravati   | Feb-21 | B.1.617   |
| GSEQ-256 Maharashtra Nagpur Feb-21 B.1.36.29     | GSEQ-256 | Maharashtra | Nagpur     | Feb-21 | B.1.36.29 |
| GSEQ-252 Maharashtra Nagpur Feb-21 B.1.36.29     | GSEQ-252 | Maharashtra | Nagpur     | Feb-21 | B.1.36.29 |
| GSEQ-223 Maharashtra Amravati Feb-21 B.1.36.29   | GSEQ-223 | Maharashtra | Amravati   | Feb-21 | B.1.36.29 |
| GSEQ-266 Maharashtra Aurangabad Feb-21 B.1.1.216 | GSEQ-266 | Maharashtra | Aurangabad | Feb-21 | B.1.1.216 |
| GSEQ-261 Maharashtra Aurangabad Feb-21 B.1.1.306 | GSEQ-261 | Maharashtra | Aurangabad | Feb-21 | B.1.1.306 |
| GSEQ-254 Maharashtra Nagpur Feb-21 B.1.1.354     | GSEQ-254 | Maharashtra | Nagpur     | Feb-21 | B.1.1.354 |
| GSEQ-265 Maharashtra Aurangabad Feb-21 B.1.1.306 | GSEQ-265 | Maharashtra | Aurangabad | Feb-21 | B.1.1.306 |
| GSEQ-226 Maharashtra Amravati Feb-21 B.1.1.306   | GSEQ-226 | Maharashtra | Amravati   | Feb-21 | B.1.1.306 |
| GSEQ-229 Maharashtra Amravati Feb-21 B.1.1.306   | GSEQ-229 | Maharashtra | Amravati   | Feb-21 | B.1.1.306 |
| GSEQ-260 Maharashtra Aurangabad Feb-21 B.1.1.340 | GSEQ-260 | Maharashtra | Aurangabad | Feb-21 | B.1.1.340 |

|                                                  |          |             |             |        |           |
|--------------------------------------------------|----------|-------------|-------------|--------|-----------|
| GSEQ-264 Maharashtra Aurangabad Feb-21 B.1.1.306 | GSEQ-264 | Maharashtra | Aurangabad  | Feb-21 | B.1.1.306 |
| GSEQ-268 Maharashtra Aurangabad Feb-21 B.1.1.306 | GSEQ-268 | Maharashtra | Aurangabad  | Feb-21 | B.1.1.306 |
| SEQ-258 Maharashtra Mumbai Dec-20 B.1.210        | SEQ-258  | Maharashtra | Mumbai      | Dec-20 | B.1.210   |
| GSEQ-373 Maharashtra Thane Feb-21 B.1.617        | GSEQ-373 | Maharashtra | Thane       | Feb-21 | B.1.617   |
| GSEQ-379 Maharashtra Thane Feb-21 B.1.617        | GSEQ-379 | Maharashtra | Thane       | Feb-21 | B.1.617   |
| GSEQ-398 Maharashtra Wardha Feb-21 B.1.617       | GSEQ-398 | Maharashtra | Wardha      | Feb-21 | B.1.617   |
| GSEQ-399 Maharashtra Wardha Feb-21 B.1.617       | GSEQ-399 | Maharashtra | Wardha      | Feb-21 | B.1.617   |
| GSEQ-382 Maharashtra Thane Feb-21 B.1.617        | GSEQ-382 | Maharashtra | Thane       | Feb-21 | B.1.617   |
| GSEQ-393 Maharashtra Wardha Feb-21 B.1.617       | GSEQ-393 | Maharashtra | Wardha      | Feb-21 | B.1.617   |
| GSEQ-386 Maharashtra Wardha Feb-21 B.1.617       | GSEQ-386 | Maharashtra | Wardha      | Feb-21 | B.1.617   |
| GSEQ-391 Maharashtra Wardha Feb-21 B.1.617       | GSEQ-391 | Maharashtra | Wardha      | Feb-21 | B.1.617   |
| GSEQ-361 Maharashtra Navi_Mumbai Feb-21 B.1.617  | GSEQ-361 | Maharashtra | Navi_Mumbai | Feb-21 | B.1.617   |
| GSEQ-390 Maharashtra Wardha Feb-21 B.1.617       | GSEQ-390 | Maharashtra | Wardha      | Feb-21 | B.1.617   |
| GSEQ-392 Maharashtra Wardha Feb-21 B.1.617       | GSEQ-392 | Maharashtra | Wardha      | Feb-21 | B.1.617   |
| GSEQ-293 Maharashtra Aurangabad Feb-21 B.1.617   | GSEQ-293 | Maharashtra | Aurangabad  | Feb-21 | B.1.617   |
| GSEQ-                                            | GSEQ-    | Maharashtra | Aurangabad  | Feb-   | B.1.617   |

|                                                  |          |                 |                 |        |           |
|--------------------------------------------------|----------|-----------------|-----------------|--------|-----------|
| 291 Maharashtra Aurangabad Feb-21 B.1.617        | 291      | ra              |                 | 21     |           |
| GSEQ-298 Maharashtra Aurangabad Feb-21 B.1.617   | GSEQ-298 | Maharasht<br>ra | Aurangabad      | Feb-21 | B.1.617   |
| GSEQ-385 Maharashtra Yavatmal Feb-21 B.1.617     | GSEQ-385 | Maharasht<br>ra | Yavatmal        | Feb-21 | B.1.617   |
| GSEQ-366 Maharashtra Navi_Mumbai Feb-21 B.1.617  | GSEQ-366 | Maharasht<br>ra | Navi_Mumb<br>ai | Feb-21 | B.1.617   |
| GSEQ-371 Maharashtra Thane Feb-21 B.1.36.29      | GSEQ-371 | Maharasht<br>ra | Thane           | Feb-21 | B.1.36.29 |
| GSEQ-294 Maharashtra Aurangabad Feb-21 B.1.36.29 | GSEQ-294 | Maharasht<br>ra | Aurangabad      | Feb-21 | B.1.36.29 |
| GSEQ-292 Maharashtra Aurangabad Feb-21 B.1.36.29 | GSEQ-292 | Maharasht<br>ra | Aurangabad      | Feb-21 | B.1.36.29 |
| GSEQ-297 Maharashtra Aurangabad Feb-21 B.1.36.29 | GSEQ-297 | Maharasht<br>ra | Aurangabad      | Feb-21 | B.1.36.29 |
| GSEQ-397 Maharashtra Wardha Feb-21 B.1.36.29     | GSEQ-397 | Maharasht<br>ra | Wardha          | Feb-21 | B.1.36.29 |
| GSEQ-296 Maharashtra Aurangabad Feb-21 B.1.36.29 | GSEQ-296 | Maharasht<br>ra | Aurangabad      | Feb-21 | B.1.36.29 |
| GSEQ-300 Maharashtra Aurangabad Feb-21 B.1.36.29 | GSEQ-300 | Maharasht<br>ra | Aurangabad      | Feb-21 | B.1.36.29 |
| GSEQ-375 Maharashtra Thane Feb-21 B.1.36.29      | GSEQ-375 | Maharasht<br>ra | Thane           | Feb-21 | B.1.36.29 |
| GSEQ-401 Maharashtra Wardha Feb-21 B.1.36.29     | GSEQ-401 | Maharasht<br>ra | Wardha          | Feb-21 | B.1.36.29 |
| GSEQ-360 Maharashtra Navi_Mumbai Feb-21 B.1.1.7  | GSEQ-360 | Maharasht<br>ra | Navi_Mumb<br>ai | Feb-21 | B.1.1.7   |
| GSEQ-378 Maharashtra Thane Feb-21 B.1.1.7        | GSEQ-378 | Maharasht<br>ra | Thane           | Feb-21 | B.1.1.7   |
| GSEQ-381 Maharashtra Thane Feb-                  | GSEQ-381 | Maharasht<br>ra | Thane           | Feb-21 | B.1.1.7   |

|                                                   |          |             |             |        |           |
|---------------------------------------------------|----------|-------------|-------------|--------|-----------|
| 21 B.1.1.7                                        |          |             |             |        |           |
| GSEQ-369 Maharashtra Thane Feb-21 B.1.1.389       | GSEQ-369 | Maharashtra | Thane       | Feb-21 | B.1.1.389 |
| GSEQ-359 Maharashtra Navi_Mumbai Feb-21 B.1.1.216 | GSEQ-359 | Maharashtra | Navi_Mumbai | Feb-21 | B.1.1.216 |
| GSEQ-384 Maharashtra Thane Feb-21 B.1.1.306       | GSEQ-384 | Maharashtra | Thane       | Feb-21 | B.1.1.306 |
| GSEQ-363 Maharashtra Navi_Mumbai Feb-21 B.1.1.306 | GSEQ-363 | Maharashtra | Navi_Mumbai | Feb-21 | B.1.1.306 |
| GSEQ-370 Maharashtra Thane Feb-21 B.1.1.306       | GSEQ-370 | Maharashtra | Thane       | Feb-21 | B.1.1.306 |
| GSEQ-383 Maharashtra Thane Feb-21 B.1.1.306       | GSEQ-383 | Maharashtra | Thane       | Feb-21 | B.1.1.306 |
| GSEQ-295 Maharashtra Aurangabad Feb-21 B.1.36.22  | GSEQ-295 | Maharashtra | Aurangabad  | Feb-21 | B.1.36.22 |
| GSEQ-286 Maharashtra Latur Feb-21 B.1.1.306       | GSEQ-286 | Maharashtra | Latur       | Feb-21 | B.1.1.306 |
| GSEQ-380 Maharashtra Thane Feb-21 B.1.1.306       | GSEQ-380 | Maharashtra | Thane       | Feb-21 | B.1.1.306 |
| GSEQ-377 Maharashtra Thane Feb-21 B.1.1.216       | GSEQ-377 | Maharashtra | Thane       | Feb-21 | B.1.1.216 |
| GSEQ-372 Maharashtra Thane Feb-21 B.1.1.216       | GSEQ-372 | Maharashtra | Thane       | Feb-21 | B.1.1.216 |
| GSEQ-425 Maharashtra Gadchiroli Feb-21 B.1.335    | GSEQ-425 | Maharashtra | Gadchiroli  | Feb-21 | B.1.335   |
| GSEQ-432 Maharashtra Bhandara Feb-21 B.1.596      | GSEQ-432 | Maharashtra | Bhandara    | Feb-21 | B.1.596   |
| GSEQ-431 Maharashtra Bhandara Feb-21 B.1.596      | GSEQ-431 | Maharashtra | Bhandara    | Feb-21 | B.1.596   |
| GSEQ-413 Maharashtra Sevagram Feb-21 B.1.617      | GSEQ-413 | Maharashtra | Sevagram    | Feb-21 | B.1.617   |

|                                                 |          |             |             |        |         |
|-------------------------------------------------|----------|-------------|-------------|--------|---------|
| GSEQ-424 Maharashtra Gadchiroli Feb-21 B.1.617  | GSEQ-424 | Maharashtra | Gadchiroli  | Feb-21 | B.1.617 |
| GSEQ-403 Maharashtra Sevagram Feb-21 B.1.617    | GSEQ-403 | Maharashtra | Sevagram    | Feb-21 | B.1.617 |
| GSEQ-419 Maharashtra Gadchiroli Feb-21 B.1.617  | GSEQ-419 | Maharashtra | Gadchiroli  | Feb-21 | B.1.617 |
| GSEQ-420 Maharashtra Gadchiroli Feb-21 B.1.617  | GSEQ-420 | Maharashtra | Gadchiroli  | Feb-21 | B.1.617 |
| GSEQ-422 Maharashtra Gadchiroli Feb-21 B.1.617  | GSEQ-422 | Maharashtra | Gadchiroli  | Feb-21 | B.1.617 |
| GSEQ-423 Maharashtra Gadchiroli Feb-21 B.1.617  | GSEQ-423 | Maharashtra | Gadchiroli  | Feb-21 | B.1.617 |
| GSEQ-374 Maharashtra Thane Feb-21 B.1.617       | GSEQ-374 | Maharashtra | Thane       | Feb-21 | B.1.617 |
| GSEQ-406 Maharashtra Sevagram Feb-21 B.1.617    | GSEQ-406 | Maharashtra | Sevagram    | Feb-21 | B.1.617 |
| GSEQ-365 Maharashtra Navi_Mumbai Feb-21 B.1.617 | GSEQ-365 | Maharashtra | Navi_Mumbai | Feb-21 | B.1.617 |
| GSEQ-387 Maharashtra Wardha Feb-21 B.1.617      | GSEQ-387 | Maharashtra | Wardha      | Feb-21 | B.1.617 |
| GSEQ-402 Maharashtra Sevagram Feb-21 B.1.617    | GSEQ-402 | Maharashtra | Sevagram    | Feb-21 | B.1.617 |
| GSEQ-388 Maharashtra Wardha Feb-21 B.1.617      | GSEQ-388 | Maharashtra | Wardha      | Feb-21 | B.1.617 |
| GSEQ-394 Maharashtra Wardha Feb-21 B.1.617      | GSEQ-394 | Maharashtra | Wardha      | Feb-21 | B.1.617 |
| GSEQ-400 Maharashtra Wardha Feb-21 B.1.617      | GSEQ-400 | Maharashtra | Wardha      | Feb-21 | B.1.617 |
| GSEQ-414 Maharashtra Sevagram Feb-21 B.1.617    | GSEQ-414 | Maharashtra | Sevagram    | Feb-21 | B.1.617 |
| GSEQ-                                           | GSEQ-    | Maharashtra | Wardha      | Feb-   | B.1.617 |

|                                                   |          |                 |                 |        |           |
|---------------------------------------------------|----------|-----------------|-----------------|--------|-----------|
| 395 Maharashtra Wardha Feb-21 B.1.617             | 395      | ra              |                 | 21     |           |
| GSEQ-405 Maharashtra Sevagram Feb-21 B.1.617      | GSEQ-405 | Maharasht<br>ra | Sevagram        | Feb-21 | B.1.617   |
| GSEQ-417 Maharashtra Sevagram Feb-21 B.1.617      | GSEQ-417 | Maharasht<br>ra | Sevagram        | Feb-21 | B.1.617   |
| GSEQ-410 Maharashtra Sevagram Feb-21 B.1.617      | GSEQ-410 | Maharasht<br>ra | Sevagram        | Feb-21 | B.1.617   |
| GSEQ-416 Maharashtra Sevagram Feb-21 B.1.36.29    | GSEQ-416 | Maharasht<br>ra | Sevagram        | Feb-21 | B.1.36.29 |
| GSEQ-407 Maharashtra Sevagram Feb-21 B.1.36.29    | GSEQ-407 | Maharasht<br>ra | Sevagram        | Feb-21 | B.1.36.29 |
| GSEQ-428 Maharashtra Bhandara Feb-21 B.1.36.29    | GSEQ-428 | Maharasht<br>ra | Bhandara        | Feb-21 | B.1.36.29 |
| GSEQ-396 Maharashtra Wardha Feb-21 B.1.1.7        | GSEQ-396 | Maharasht<br>ra | Wardha          | Feb-21 | B.1.1.7   |
| GSEQ-427 Maharashtra Gadchiroli Feb-21 B.1.1.7    | GSEQ-427 | Maharasht<br>ra | Gadchiroli      | Feb-21 | B.1.1.7   |
| GSEQ-404 Maharashtra Sevagram Feb-21 B.1.1.306    | GSEQ-404 | Maharasht<br>ra | Sevagram        | Feb-21 | B.1.1.306 |
| GSEQ-356 Maharashtra Vasai_Virar Feb-21 B.1.1.306 | GSEQ-356 | Maharasht<br>ra | Vasai_Virar     | Feb-21 | B.1.1.306 |
| GSEQ-358 Maharashtra Navi_Mumbai Feb-21 B.1.1.306 | GSEQ-358 | Maharasht<br>ra | Navi_Mumb<br>ai | Feb-21 | B.1.1.306 |
| GSEQ-362 Maharashtra Navi_Mumbai Feb-21 B.1.1.306 | GSEQ-362 | Maharasht<br>ra | Navi_Mumb<br>ai | Feb-21 | B.1.1.306 |
| GSEQ-364 Maharashtra Navi_Mumbai Feb-21 B.1.1.306 | GSEQ-364 | Maharasht<br>ra | Navi_Mumb<br>ai | Feb-21 | B.1.1.306 |
| GSEQ-412 Maharashtra Sevagram Feb-21 B.1.36       | GSEQ-412 | Maharasht<br>ra | Sevagram        | Feb-21 | B.1.36    |
| GSEQ-465 Maharashtra Aurangabad Mar-              | GSEQ-465 | Maharasht<br>ra | Aurangabad      | Mar-21 | B.1.596   |

|                                                  |          |             |            |        |           |
|--------------------------------------------------|----------|-------------|------------|--------|-----------|
| 21 B.1.596                                       |          |             |            |        |           |
| GSEQ-471 Maharashtra Aurangabad Mar-21 B.1.596   | GSEQ-471 | Maharashtra | Aurangabad | Mar-21 | B.1.596   |
| GSEQ-483 Maharashtra Gondia Feb-21 B.1.617       | GSEQ-483 | Maharashtra | Gondia     | Feb-21 | B.1.617   |
| GSEQ-482 Maharashtra Gondia Feb-21 B.1.617       | GSEQ-482 | Maharashtra | Gondia     | Feb-21 | B.1.617   |
| GSEQ-463 Maharashtra Aurangabad Feb-21 B.1.617   | GSEQ-463 | Maharashtra | Aurangabad | Feb-21 | B.1.617   |
| GSEQ-478 Maharashtra Gondia Feb-21 B.1.617       | GSEQ-478 | Maharashtra | Gondia     | Feb-21 | B.1.617   |
| GSEQ-481 Maharashtra Gondia Feb-21 B.1.617       | GSEQ-481 | Maharashtra | Gondia     | Feb-21 | B.1.617   |
| GSEQ-468 Maharashtra Aurangabad Mar-21 B.1.617   | GSEQ-468 | Maharashtra | Aurangabad | Mar-21 | B.1.617   |
| GSEQ-464 Maharashtra Aurangabad Mar-21 B.1.617   | GSEQ-464 | Maharashtra | Aurangabad | Mar-21 | B.1.617   |
| GSEQ-470 Maharashtra Aurangabad Mar-21 B.1.617   | GSEQ-470 | Maharashtra | Aurangabad | Mar-21 | B.1.617   |
| GSEQ-480 Maharashtra Gondia Feb-21 B.1.617       | GSEQ-480 | Maharashtra | Gondia     | Feb-21 | B.1.617   |
| GSEQ-473 Maharashtra Nanded Mar-21 B.1.617       | GSEQ-473 | Maharashtra | Nanded     | Mar-21 | B.1.617   |
| GSEQ-474 Maharashtra Nanded Feb-21 B.1.617       | GSEQ-474 | Maharashtra | Nanded     | Feb-21 | B.1.617   |
| GSEQ-469 Maharashtra Aurangabad Mar-21 B.1.36.29 | GSEQ-469 | Maharashtra | Aurangabad | Mar-21 | B.1.36.29 |
| GSEQ-476 Maharashtra Nanded Feb-21 B.1.36.29     | GSEQ-476 | Maharashtra | Nanded     | Feb-21 | B.1.36.29 |
| GSEQ-475 Maharashtra Nanded Feb-21 B.1.36.29     | GSEQ-475 | Maharashtra | Nanded     | Feb-21 | B.1.36.29 |



|                                                   |          |             |             |        |           |
|---------------------------------------------------|----------|-------------|-------------|--------|-----------|
| GSEQ-472 Maharashtra Nanded Mar-21 B.1.1.306      | GSEQ-472 | Maharashtra | Nanded      | Mar-21 | B.1.1.306 |
| GSEQ-430 Maharashtra Bhandara Feb-21 B.1.596      | GSEQ-430 | Maharashtra | Bhandara    | Feb-21 | B.1.596   |
| GSEQ-467 Maharashtra Aurangabad Mar-21 B.1.596    | GSEQ-467 | Maharashtra | Aurangabad  | Mar-21 | B.1.596   |
| GSEQ-421 Maharashtra Gadchiroli Feb-21 B.1.241    | GSEQ-421 | Maharashtra | Gadchiroli  | Feb-21 | B.1.241   |
| GSEQ-426 Maharashtra Gadchiroli Feb-21 B.1.617    | GSEQ-426 | Maharashtra | Gadchiroli  | Feb-21 | B.1.617   |
| GSEQ-462 Maharashtra Aurangabad Feb-21 B.1.617    | GSEQ-462 | Maharashtra | Aurangabad  | Feb-21 | B.1.617   |
| GSEQ-418 Maharashtra Gadchiroli Feb-21 B.1.617    | GSEQ-418 | Maharashtra | Gadchiroli  | Feb-21 | B.1.617   |
| GSEQ-355 Maharashtra Vasai_Virar Feb-21 B.1.617   | GSEQ-355 | Maharashtra | Vasai_Virar | Feb-21 | B.1.617   |
| GSEQ-408 Maharashtra Sevagram Feb-21 B.1.617      | GSEQ-408 | Maharashtra | Sevagram    | Feb-21 | B.1.617   |
| GSEQ-415 Maharashtra Sevagram Feb-21 B.1.617      | GSEQ-415 | Maharashtra | Sevagram    | Feb-21 | B.1.617   |
| GSEQ-411 Maharashtra Sevagram Feb-21 B.1.36.29    | GSEQ-411 | Maharashtra | Sevagram    | Feb-21 | B.1.36.29 |
| GSEQ-409 Maharashtra Sevagram Feb-21 B.1.36.29    | GSEQ-409 | Maharashtra | Sevagram    | Feb-21 | B.1.36.29 |
| GSEQ-354 Maharashtra Vasai_Virar Feb-21 B.1.1.7   | GSEQ-354 | Maharashtra | Vasai_Virar | Feb-21 | B.1.1.7   |
| GSEQ-353 Maharashtra Vasai_Virar Feb-21 B.1.1.306 | GSEQ-353 | Maharashtra | Vasai_Virar | Feb-21 | B.1.1.306 |
| GSEQ-351 Maharashtra Vasai_Virar Feb-21 B.1.1.306 | GSEQ-351 | Maharashtra | Vasai_Virar | Feb-21 | B.1.1.306 |
| GSEQ-                                             | GSEQ-    | Maharashtra | Vasai_Virar | Feb-   | AE.7      |

|                                                   |                 |                 |                 |        |           |
|---------------------------------------------------|-----------------|-----------------|-----------------|--------|-----------|
| 352 Maharashtra Vasai_Virar Feb-21 AE.7           | 352             | ra              |                 | 21     |           |
| GSEQ-477 Maharashtra Gondia Feb-21 B.1.1.306      | GSEQ-477        | Maharasht<br>ra | Gondia          | Feb-21 | B.1.1.306 |
| GSEQ-357 Maharashtra Navi_Mumbai Feb-21 B.1.1.306 | GSEQ-357        | Maharasht<br>ra | Navi_Mumb<br>ai | Feb-21 | B.1.1.306 |
| GSEQ-680 Maharashtra Thane Mar-21 B.1.1.214       | GSEQ-680        | Maharasht<br>ra | Thane           | Mar-21 | B.1.1.214 |
| GSEQ-799 Maharashtra Wardha Mar-21 B.1.617        | GSEQ-799        | Maharasht<br>ra | Wardha          | Mar-21 | B.1.617   |
| GSEQ-623 Maharashtra Parbhani Feb-21 B.1          | GSEQ-623        | Maharasht<br>ra | Parbhani        | Feb-21 | B.1       |
| GSEQ-811 Maharashtra Wardha Mar-21 B.1.596        | GSEQ-811        | Maharasht<br>ra | Wardha          | Mar-21 | B.1.596   |
| GSEQ-757 Maharashtra Aurangabad Mar-21 B.1.596    | GSEQ-757        | Maharasht<br>ra | Aurangabad      | Mar-21 | B.1.596   |
| GSEQ-703 Maharashtra Posheri_Palghar Mar-21 B.1   | GSEQ-703        | Maharasht<br>ra | Palghar         | Mar-21 | B.1       |
| GSEQ-745 Maharashtra Jalna Mar-21 B.1.617         | GSEQ-745        | Maharasht<br>ra | Jalna           | Mar-21 | B.1.617   |
| GSEQ-684 Maharashtra Thane Mar-21 B.1.617         | GSEQ-684        | Maharasht<br>ra | Thane           | Mar-21 | B.1.617   |
| GSEQ-665 Maharashtra Thane Jan-21 B.1             | GSEQ-665        | Maharasht<br>ra | Thane           | Jan-21 | B.1       |
| 2019nCoV-294622 Maharashtra Pune Feb-21 B.1.617   | 2019nCoV-294622 | Maharasht<br>ra | Pune            | Feb-21 | B.1.617   |
| 2019nCoV-295035 Maharashtra Pune Mar-21 B.1.617   | 2019nCoV-295035 | Maharasht<br>ra | Pune            | Mar-21 | B.1.617   |
| 2019nCoV-294309 Maharashtra Pune Feb-21 B.1.617   | 2019nCoV-294309 | Maharasht<br>ra | Pune            | Feb-21 | B.1.617   |
| 2019nCoV-294402 Maharashtra Pune Feb-21 B.1.617   | 2019nCoV-294402 | Maharasht<br>ra | Pune            | Feb-21 | B.1.617   |

|                                                 |                 |             |            |        |         |
|-------------------------------------------------|-----------------|-------------|------------|--------|---------|
| GSEQ-782 Maharashtra Sevagram Mar-21 B.1.617    | GSEQ-782        | Maharashtra | Sevagram   | Mar-21 | B.1.617 |
| GSEQ-754 Maharashtra Aurangabad Mar-21 B.1      | GSEQ-754        | Maharashtra | Aurangabad | Mar-21 | B.1     |
| GSEQ-838 Maharashtra Gadchiroli Mar-21 B.1.617  | GSEQ-838        | Maharashtra | Gadchiroli | Mar-21 | B.1.617 |
| GSEQ-755 Maharashtra Aurangabad Mar-21 B.1.617  | GSEQ-755        | Maharashtra | Aurangabad | Mar-21 | B.1.617 |
| GSEQ-795 Maharashtra Sevagram Mar-21 B.1.617    | GSEQ-795        | Maharashtra | Sevagram   | Mar-21 | B.1.617 |
| GSEQ-743 Maharashtra Jalna Mar-21 B.1.617       | GSEQ-743        | Maharashtra | Jalna      | Mar-21 | B.1.617 |
| GSEQ-749 Maharashtra Jalna Mar-21 B.1.617       | GSEQ-749        | Maharashtra | Jalna      | Mar-21 | B.1.617 |
| GSEQ-793 Maharashtra Sevagram Mar-21 B.1.617    | GSEQ-793        | Maharashtra | Sevagram   | Mar-21 | B.1.617 |
| 2019nCoV-294251 Maharashtra Pune Feb-21 B.1.617 | 2019nCoV-294251 | Maharashtra | Pune       | Feb-21 | B.1.617 |
| GSEQ-694 Maharashtra Thane Mar-21 B.1.93        | GSEQ-694        | Maharashtra | Thane      | Mar-21 | B.1.93  |
| GSEQ-760 Maharashtra Aurangabad Mar-21 B.1.617  | GSEQ-760        | Maharashtra | Aurangabad | Mar-21 | B.1.617 |
| GSEQ-759 Maharashtra Aurangabad Mar-21 B.1.617  | GSEQ-759        | Maharashtra | Aurangabad | Mar-21 | B.1.617 |
| GSEQ-762 Maharashtra Aurangabad Mar-21 B.1.617  | GSEQ-762        | Maharashtra | Aurangabad | Mar-21 | B.1.617 |
| GSEQ-758 Maharashtra Aurangabad Mar-21 B.1.617  | GSEQ-758        | Maharashtra | Aurangabad | Mar-21 | B.1.617 |
| GSEQ-763 Maharashtra Aurangabad Mar-21 B.1.617  | GSEQ-763        | Maharashtra | Aurangabad | Mar-21 | B.1.617 |
| GSEQ-                                           | GSEQ-           | Maharashtra | Hingoli    | Feb-   | B.1.617 |

|                                                     |                 |                 |            |        |         |
|-----------------------------------------------------|-----------------|-----------------|------------|--------|---------|
| 638 Maharashtra Hingoli Feb-21 B.1.617              | 638             | ra              |            | 21     |         |
| GSEQ-702 Maharashtra Posheri_Palghar Mar-21 B.1.617 | GSEQ-702        | Maharasht<br>ra | Palghar    | Mar-21 | B.1.617 |
| GSEQ-812 Maharashtra Wardha Mar-21 B.1.617          | GSEQ-812        | Maharasht<br>ra | Wardha     | Mar-21 | B.1.617 |
| GSEQ-742 Maharashtra Jalna Mar-21 B.1.617           | GSEQ-742        | Maharasht<br>ra | Jalna      | Mar-21 | B.1.617 |
| 2019nCoV-294340 Maharashtra Pune Feb-21 B.1.617     | 2019nCoV-294340 | Maharasht<br>ra | Pune       | Feb-21 | B.1.617 |
| GSEQ-787 Maharashtra Sevagram Mar-21 B.1.617        | GSEQ-787        | Maharasht<br>ra | Sevagram   | Mar-21 | B.1.617 |
| GSEQ-814 Maharashtra Wardha Mar-21 B.1.617          | GSEQ-814        | Maharasht<br>ra | Wardha     | Mar-21 | B.1.617 |
| GSEQ-649 Maharashtra Hingoli Feb-21 B.1.617         | GSEQ-649        | Maharasht<br>ra | Hingoli    | Feb-21 | B.1.617 |
| GSEQ-756 Maharashtra Aurangabad Mar-21 B.1.617      | GSEQ-756        | Maharasht<br>ra | Aurangabad | Mar-21 | B.1.617 |
| GSEQ-836 Maharashtra Gadchiroli Mar-21 B.1.617      | GSEQ-836        | Maharasht<br>ra | Gadchiroli | Mar-21 | B.1.617 |
| GSEQ-786 Maharashtra Sevagram Mar-21 B.1.617        | GSEQ-786        | Maharasht<br>ra | Sevagram   | Mar-21 | B.1.617 |
| GSEQ-804 Maharashtra Wardha Mar-21 B.1.617          | GSEQ-804        | Maharasht<br>ra | Wardha     | Mar-21 | B.1.617 |
| GSEQ-803 Maharashtra Wardha Mar-21 B.1.617          | GSEQ-803        | Maharasht<br>ra | Wardha     | Mar-21 | B.1.617 |
| GSEQ-808 Maharashtra Wardha Mar-21 B.1.617          | GSEQ-808        | Maharasht<br>ra | Wardha     | Mar-21 | B.1.617 |
| GSEQ-699 Maharashtra Thane Mar-21 B.1.617           | GSEQ-699        | Maharasht<br>ra | Thane      | Mar-21 | B.1.617 |
| GSEQ-813 Maharashtra Wardha Mar-                    | GSEQ-813        | Maharasht<br>ra | Wardha     | Mar-21 | B.1.617 |

|                                                   |                 |             |          |        |           |
|---------------------------------------------------|-----------------|-------------|----------|--------|-----------|
| 21 B.1.617                                        |                 |             |          |        |           |
| GSEQ-792 Maharashtra Sevagram Mar-21 B.1.36.29    | GSEQ-792        | Maharashtra | Sevagram | Mar-21 | B.1.36.29 |
| GSEQ-806 Maharashtra Wardha Mar-21 B.1.36.29      | GSEQ-806        | Maharashtra | Wardha   | Mar-21 | B.1.36.29 |
| GSEQ-697 Maharashtra Thane Mar-21 B.1.1.7         | GSEQ-697        | Maharashtra | Thane    | Mar-21 | B.1.1.7   |
| 2019nCoV-294645 Maharashtra Pune Feb-21 B.1.1.7   | 2019nCoV-294645 | Maharashtra | Pune     | Feb-21 | B.1.1.7   |
| GSEQ-698 Maharashtra Thane Mar-21 B.1.1.216       | GSEQ-698        | Maharashtra | Thane    | Mar-21 | B.1.1.216 |
| GSEQ-700 Maharashtra Thane Mar-21 B.1.1           | GSEQ-700        | Maharashtra | Thane    | Mar-21 | B.1.1     |
| GSEQ-674 Maharashtra Thane Mar-21 B.1.1.306       | GSEQ-674        | Maharashtra | Thane    | Mar-21 | B.1.1.306 |
| GSEQ-783 Maharashtra Sevagram Mar-21 B.1.1.306    | GSEQ-783        | Maharashtra | Sevagram | Mar-21 | B.1.1.306 |
| GSEQ-788 Maharashtra Sevagram Mar-21 B.1.1.306    | GSEQ-788        | Maharashtra | Sevagram | Mar-21 | B.1.1.306 |
| 2019nCoV-293269 Maharashtra Pune Feb-21 B.1.1.306 | 2019nCoV-293269 | Maharashtra | Pune     | Feb-21 | B.1.1.306 |
| GSEQ-720 Maharashtra Mumbai Mar-21 B.1.1          | GSEQ-720        | Maharashtra | Mumbai   | Mar-21 | B.1.1     |
| GSEQ-752 Maharashtra Jalna Mar-21 B.1.540         | GSEQ-752        | Maharashtra | Jalna    | Mar-21 | B.1.540   |
| GSEQ-744 Maharashtra Jalna Mar-21 B.1.1.216       | GSEQ-744        | Maharashtra | Jalna    | Mar-21 | B.1.1.216 |
| GSEQ-696 Maharashtra Thane Mar-21 B.1.36          | GSEQ-696        | Maharashtra | Thane    | Mar-21 | B.1.36    |
| 2019nCoV-294575 Maharashtra Pune Feb-21 B.1.617   | 2019nCoV-294575 | Maharashtra | Pune     | Feb-21 | B.1.617   |

|                                                 |                 |             |          |        |         |
|-------------------------------------------------|-----------------|-------------|----------|--------|---------|
| 2019nCoV-295647 Maharashtra Pune Mar-21 B.1.617 | 2019nCoV-295647 | Maharashtra | Pune     | Mar-21 | B.1.617 |
| 2019nCoV-295545 Maharashtra Pune Mar-21 B.1.617 | 2019nCoV-295545 | Maharashtra | Pune     | Mar-21 | B.1.617 |
| 2019nCoV-296386 Maharashtra Pune Mar-21 B.1.617 | 2019nCoV-296386 | Maharashtra | Pune     | Mar-21 | B.1.617 |
| 2019nCoV-296092 Maharashtra Pune Mar-21 B.1.617 | 2019nCoV-296092 | Maharashtra | Pune     | Mar-21 | B.1.617 |
| GSEQ-635 Maharashtra Hingoli Feb-21 B.1.617     | GSEQ-635        | Maharashtra | Hingoli  | Feb-21 | B.1.617 |
| GSEQ-846 Maharashtra Nanded Mar-21 B.1.617      | GSEQ-846        | Maharashtra | Nanded   | Mar-21 | B.1.617 |
| GSEQ-622 Maharashtra Parbhani Feb-21 B.1.617    | GSEQ-622        | Maharashtra | Parbhani | Feb-21 | B.1.617 |
| GSEQ-850 Maharashtra Nanded Mar-21 B.1.617      | GSEQ-850        | Maharashtra | Nanded   | Mar-21 | B.1.617 |
| GSEQ-800 Maharashtra Wardha Mar-21 B.1.617      | GSEQ-800        | Maharashtra | Wardha   | Mar-21 | B.1.617 |
| GSEQ-704 Maharashtra Palghar Mar-21 B.1.617     | GSEQ-704        | Maharashtra | Palghar  | Mar-21 | B.1.617 |
| 2019nCoV-295702 Maharashtra Pune Mar-21 B.1.617 | 2019nCoV-295702 | Maharashtra | Pune     | Mar-21 | B.1.617 |
| GSEQ-723 Maharashtra Mumbai Mar-21 B.1.617      | GSEQ-723        | Maharashtra | Mumbai   | Mar-21 | B.1.617 |
| GSEQ-847 Maharashtra Nanded Mar-21 B.1.617      | GSEQ-847        | Maharashtra | Nanded   | Mar-21 | B.1.617 |
| GSEQ-643 Maharashtra Hingoli Feb-21 B.1.617     | GSEQ-643        | Maharashtra | Hingoli  | Feb-21 | B.1.617 |
| 2019nCoV-296597 Maharashtra Pune Mar-21 B.1.617 | 2019nCoV-296597 | Maharashtra | Pune     | Mar-21 | B.1.617 |
| GSEQ-                                           | GSEQ-           | Maharashtra | Parbhani | Feb-   | B.1.617 |

|                                                   |                 |             |         |        |           |
|---------------------------------------------------|-----------------|-------------|---------|--------|-----------|
| 626 Maharashtra Parbhani Feb-21 B.1.617           | 626             | ra          |         | 21     |           |
| 2019nCoV-296989 Maharashtra Pune Mar-21 B.1.617   | 2019nCoV-296989 | Maharashtra | Pune    | Mar-21 | B.1.617   |
| GSEQ-640 Maharashtra Hingoli Feb-21 B.1.617       | GSEQ-640        | Maharashtra | Hingoli | Feb-21 | B.1.617   |
| 2019nCoV-295874 Maharashtra Pune Mar-21 B.1.36.29 | 2019nCoV-295874 | Maharashtra | Pune    | Mar-21 | B.1.36.29 |
| GSEQ-845 Maharashtra Nanded Mar-21 B.1.36.29      | GSEQ-845        | Maharashtra | Nanded  | Mar-21 | B.1.36.29 |
| 2019nCoV-292717 Maharashtra Pune Feb-21 B.1.36.29 | 2019nCoV-292717 | Maharashtra | Pune    | Feb-21 | B.1.36.29 |
| GSEQ-717 Maharashtra Boisar Mar-21 B.1.36.29      | GSEQ-717        | Maharashtra | Boisar  | Mar-21 | B.1.36.29 |
| GSEQ-693 Maharashtra Thane Mar-21 B.1.1.7         | GSEQ-693        | Maharashtra | Thane   | Mar-21 | B.1.1.7   |
| GSEQ-816 Maharashtra Alibag Feb-21 B.1.1.306      | GSEQ-816        | Maharashtra | Alibag  | Feb-21 | B.1.1.306 |
| GSEQ-820 Maharashtra Alibag Mar-21 B.1.1.372      | GSEQ-820        | Maharashtra | Alibag  | Mar-21 | B.1.1.372 |
| 2019nCoV-296531 Maharashtra Pune Mar-21 B.1.1     | 2019nCoV-296531 | Maharashtra | Pune    | Mar-21 | B.1.1     |
| GSEQ-679 Maharashtra Thane Mar-21 B.1.1.306       | GSEQ-679        | Maharashtra | Thane   | Mar-21 | B.1.1.306 |
| GSEQ-666 Maharashtra Thane Mar-21 B.1.1.306       | GSEQ-666        | Maharashtra | Thane   | Mar-21 | B.1.1.306 |
| GSEQ-667 Maharashtra Thane Mar-21 B.1.1.306       | GSEQ-667        | Maharashtra | Thane   | Mar-21 | B.1.1.306 |
| GSEQ-676 Maharashtra Thane Feb-21 B.1.1.306       | GSEQ-676        | Maharashtra | Thane   | Feb-21 | B.1.1.306 |
| GSEQ-721 Maharashtra Mumbai Mar-                  | GSEQ-721        | Maharashtra | Mumbai  | Mar-21 | B.1.1     |

|                                                 |           |             |            |        |         |
|-------------------------------------------------|-----------|-------------|------------|--------|---------|
| 21 B.1.1                                        |           |             |            |        |         |
| GSEQ-719 Maharashtra Mumbai Mar-21 B.1.1        | GSEQ-719  | Maharashtra | Mumbai     | Mar-21 | B.1.1   |
| GSEQ-923 Maharashtra Chandrapur Mar-21 B.1.617  | GSEQ-923  | Maharashtra | Chandrapur | Mar-21 | B.1.617 |
| SEQ-739 Maharashtra Nagpur Dec-20 B.1.617       | SEQ-739   | Maharashtra | Nagpur     | Dec-20 | B.1.617 |
| GSEQ-880 Maharashtra Chandrapur Feb-21 B.1.617  | GSEQ-880  | Maharashtra | Chandrapur | Feb-21 | B.1.617 |
| GSEQ-927 Maharashtra Chandrapur Mar-21 B.1.617  | GSEQ-927  | Maharashtra | Chandrapur | Mar-21 | B.1.617 |
| GSEQ-875 Maharashtra Chandrapur Mar-21 B.1      | GSEQ-875  | Maharashtra | Chandrapur | Mar-21 | B.1     |
| GSEQ-928 Maharashtra Chandrapur Mar-21 B.1.617  | GSEQ-928  | Maharashtra | Chandrapur | Mar-21 | B.1.617 |
| GSEQ-925 Maharashtra Chandrapur Mar-21 B.1.617  | GSEQ-925  | Maharashtra | Chandrapur | Mar-21 | B.1.617 |
| GSEQ-922 Maharashtra Chandrapur Mar-21 B.1.617  | GSEQ-922  | Maharashtra | Chandrapur | Mar-21 | B.1.617 |
| GSEQ-1014 Maharashtra Aurangabad Feb-21 B.1.617 | GSEQ-1014 | Maharashtra | Aurangabad | Feb-21 | B.1.617 |
| GSEQ-1015 Maharashtra Aurangabad Feb-21 B.1.617 | GSEQ-1015 | Maharashtra | Aurangabad | Feb-21 | B.1.617 |
| GSEQ-877 Maharashtra Chandrapur Feb-21 B.1.617  | GSEQ-877  | Maharashtra | Chandrapur | Feb-21 | B.1.617 |
| GSEQ-929 Maharashtra Chandrapur Mar-21 B.1      | GSEQ-929  | Maharashtra | Chandrapur | Mar-21 | B.1     |
| GSEQ-924 Maharashtra Chandrapur Mar-21 B.1      | GSEQ-924  | Maharashtra | Chandrapur | Mar-21 | B.1     |
| GSEQ-876 Maharashtra Chandrapur Feb-21 B.1      | GSEQ-876  | Maharashtra | Chandrapur | Feb-21 | B.1     |



|                                                   |                 |             |            |        |           |
|---------------------------------------------------|-----------------|-------------|------------|--------|-----------|
| GSEQ-886 Maharashtra Chandrapur Feb-21 B.1.617    | GSEQ-886        | Maharashtra | Chandrapur | Feb-21 | B.1.617   |
| SEQ-724 Maharashtra Nagpur Dec-20 B.1.36.29       | SEQ-724         | Maharashtra | Nagpur     | Dec-20 | B.1.36.29 |
| GSEQ-881 Maharashtra Chandrapur Feb-21 B.1.36.29  | GSEQ-881        | Maharashtra | Chandrapur | Feb-21 | B.1.36.29 |
| GSEQ-1013 Maharashtra Aurangabad Feb-21 B.1.1.306 | GSEQ-1013       | Maharashtra | Aurangabad | Feb-21 | B.1.1.306 |
| SEQ-735 Maharashtra Nagpur Dec-20 B.1.1.306       | SEQ-735         | Maharashtra | Nagpur     | Dec-20 | B.1.1.306 |
| GSEQ-1017 Maharashtra Aurangabad Mar-21 B.1.36    | GSEQ-1017       | Maharashtra | Aurangabad | Mar-21 | B.1.36    |
| GSEQ-882 Maharashtra Chandrapur Feb-21 B.1.1.354  | GSEQ-882        | Maharashtra | Chandrapur | Feb-21 | B.1.1.354 |
| GSEQ-1016 Maharashtra Aurangabad Feb-21 B.1.1     | GSEQ-1016       | Maharashtra | Aurangabad | Feb-21 | B.1.1     |
| SEQ-664 Maharashtra Nagpur Sep-20 B.1             | SEQ-664         | Maharashtra | Nagpur     | Sep-20 | B.1       |
| 2019nCoV-297093 Maharashtra Pune Mar-21 B.1.241   | 2019nCoV-297093 | Maharashtra | Pune       | Mar-21 | B.1.241   |
| GSEQ-1129 Maharashtra Palghar Mar-21 B.1.617      | GSEQ-1129       | Maharashtra | Palghar    | Mar-21 | B.1.617   |
| GSEQ-926 Maharashtra Chandrapur Mar-21 B.1.617    | GSEQ-926        | Maharashtra | Chandrapur | Mar-21 | B.1.617   |
| GSEQ-884 Maharashtra Chandrapur Feb-21 B.1.617    | GSEQ-884        | Maharashtra | Chandrapur | Feb-21 | B.1.617   |
| 2019nCoV-297094 Maharashtra Pune Mar-21 B.1.617   | 2019nCoV-297094 | Maharashtra | Pune       | Mar-21 | B.1.617   |
| GSEQ-852 Maharashtra Nanded Feb-21 B.1.617        | GSEQ-852        | Maharashtra | Nanded     | Feb-21 | B.1.617   |
| GSEQ-                                             | GSEQ-           | Maharashtra | Chandrapur | Feb-   | B.1.617   |

|                                                |           |                 |            |        |           |
|------------------------------------------------|-----------|-----------------|------------|--------|-----------|
| 883 Maharashtra Chandrapur Feb-21 B.1.617      | 883       | ra              |            | 21     |           |
| GSEQ-878 Maharashtra Chandrapur Feb-21 B.1.617 | GSEQ-878  | Maharasht<br>ra | Chandrapur | Feb-21 | B.1.617   |
| GSEQ-1140 Maharashtra Thane Mar-21 B.1.1.306   | GSEQ-1140 | Maharasht<br>ra | Thane      | Mar-21 | B.1.1.306 |
| GSEQ-1131 Maharashtra Palghar Mar-21 B.1.1.306 | GSEQ-1131 | Maharasht<br>ra | Palghar    | Mar-21 | B.1.1.306 |
| SEQ-259 Maharashtra Mumbai Dec-20 B.1.210      | SEQ-259   | Maharasht<br>ra | Mumbai     | Dec-20 | B.1.210   |
| GSEQ-1301 Maharashtra Nanded Mar-21 B.1.617    | GSEQ-1301 | Maharasht<br>ra | Nanded     | Mar-21 | B.1.617   |
| GSEQ-1302 Maharashtra Nanded Mar-21 B.1.617    | GSEQ-1302 | Maharasht<br>ra | Nanded     | Mar-21 | B.1.617   |
| GSEQ-1308 Maharashtra Nanded Mar-21 B.1.617    | GSEQ-1308 | Maharasht<br>ra | Nanded     | Mar-21 | B.1.617   |
| GSEQ-1315 Maharashtra Nanded Mar-21 B.1.617    | GSEQ-1315 | Maharasht<br>ra | Nanded     | Mar-21 | B.1.617   |
| GSEQ-1300 Maharashtra Nanded Mar-21 B.1.617    | GSEQ-1300 | Maharasht<br>ra | Nanded     | Mar-21 | B.1.617   |
| GSEQ-1312 Maharashtra Nanded Mar-21 B.1.617    | GSEQ-1312 | Maharasht<br>ra | Nanded     | Mar-21 | B.1.617   |
| GSEQ-1297 Maharashtra Nanded Mar-21 B.1.617    | GSEQ-1297 | Maharasht<br>ra | Nanded     | Mar-21 | B.1.617   |
| GSEQ-1320 Maharashtra Nanded Mar-21 B.1.617    | GSEQ-1320 | Maharasht<br>ra | Nanded     | Mar-21 | B.1.617   |
| GSEQ-1318 Maharashtra Nanded Mar-21 B.1.617    | GSEQ-1318 | Maharasht<br>ra | Nanded     | Mar-21 | B.1.617   |
| GSEQ-1303 Maharashtra Nanded Mar-21 B.1.617    | GSEQ-1303 | Maharasht<br>ra | Nanded     | Mar-21 | B.1.617   |
| GSEQ-1304 Maharashtra Nanded Mar-              | GSEQ-1304 | Maharasht<br>ra | Nanded     | Mar-21 | B.1.617   |

|                                                |           |             |        |        |            |
|------------------------------------------------|-----------|-------------|--------|--------|------------|
| 21 B.1.617                                     |           |             |        |        |            |
| GSEQ-1296 Maharashtra Nanded Mar-21 B.1.617    | GSEQ-1296 | Maharashtra | Nanded | Mar-21 | B.1.617    |
| GSEQ-1311 Maharashtra Nanded Mar-21 B.1.617    | GSEQ-1311 | Maharashtra | Nanded | Mar-21 | B.1.617    |
| GSEQ-1316 Maharashtra Nanded Mar-21 B.1.617    | GSEQ-1316 | Maharashtra | Nanded | Mar-21 | B.1.617    |
| GSEQ-1161 Maharashtra Mumbai Mar-21 B.1.617    | GSEQ-1161 | Maharashtra | Mumbai | Mar-21 | B.1.617    |
| GSEQ-1162 Maharashtra Mumbai Mar-21 B.1.617    | GSEQ-1162 | Maharashtra | Mumbai | Mar-21 | B.1.617    |
| GSEQ-1164 Maharashtra Mumbai Mar-21 B.1.617    | GSEQ-1164 | Maharashtra | Mumbai | Mar-21 | B.1.617    |
| GSEQ-1294 Maharashtra Nanded Mar-21 B.1.596    | GSEQ-1294 | Maharashtra | Nanded | Mar-21 | B.1.596    |
| GSEQ-1307 Maharashtra Nanded Mar-21 B.1.617    | GSEQ-1307 | Maharashtra | Nanded | Mar-21 | B.1.617    |
| GSEQ-1295 Maharashtra Nanded Mar-21 B.1.617    | GSEQ-1295 | Maharashtra | Nanded | Mar-21 | B.1.617    |
| GSEQ-1309 Maharashtra Nanded Mar-21 B.1.617    | GSEQ-1309 | Maharashtra | Nanded | Mar-21 | B.1.617    |
| GSEQ-1163 Maharashtra Mumbai Mar-21 B.1.617    | GSEQ-1163 | Maharashtra | Mumbai | Mar-21 | B.1.617    |
| GSEQ-1165 Maharashtra Mumbai Mar-21 B.1.617    | GSEQ-1165 | Maharashtra | Mumbai | Mar-21 | B.1.617    |
| GSEQ-1306 Maharashtra Nanded Mar-21 B.1.617    | GSEQ-1306 | Maharashtra | Nanded | Mar-21 | B.1.617    |
| GSEQ-1299 Maharashtra Nanded Mar-21 B.1.177.42 | GSEQ-1299 | Maharashtra | Nanded | Mar-21 | B.1.177.42 |
| GSEQ-1313 Maharashtra Nanded Mar-21 B.1.177.17 | GSEQ-1313 | Maharashtra | Nanded | Mar-21 | B.1.177.17 |

|                                               |          |             |         |        |           |
|-----------------------------------------------|----------|-------------|---------|--------|-----------|
| GSEQ-771 Maharashtra Mumbai Mar-21 B.1.36.29  | GSEQ-771 | Maharashtra | Mumbai  | Mar-21 | B.1.36.29 |
| GSEQ-901 Maharashtra Hingoli Feb-21 B.1.36.29 | GSEQ-901 | Maharashtra | Hingoli | Feb-21 | B.1.36.29 |
| GSEQ-634 Maharashtra Hingoli Feb-21 B.1.36    | GSEQ-634 | Maharashtra | Hingoli | Feb-21 | B.1.36    |
| GSEQ-668 Maharashtra Thane Mar-21 B.1.1.306   | GSEQ-668 | Maharashtra | Thane   | Mar-21 | B.1.1.306 |
| GSEQ-673 Maharashtra Thane Mar-21 B.1.1.306   | GSEQ-673 | Maharashtra | Thane   | Mar-21 | B.1.1.306 |
| GSEQ-681 Maharashtra Thane Mar-21 B.1.1.306   | GSEQ-681 | Maharashtra | Thane   | Mar-21 | B.1.1.306 |
| GSEQ-692 Maharashtra Thane Mar-21 B.1.1       | GSEQ-692 | Maharashtra | Thane   | Mar-21 | B.1.1     |
| GSEQ-768 Maharashtra Mumbai Mar-21 B.1.1.216  | GSEQ-768 | Maharashtra | Mumbai  | Mar-21 | B.1.1.216 |
| GSEQ-810 Maharashtra Wardha Mar-21 B.1.617    | GSEQ-810 | Maharashtra | Wardha  | Mar-21 | B.1.617   |
| GSEQ-639 Maharashtra Hingoli Feb-21 B.1.617   | GSEQ-639 | Maharashtra | Hingoli | Feb-21 | B.1.617   |
| GSEQ-892 Maharashtra Hingoli Feb-21 B.1.617   | GSEQ-892 | Maharashtra | Hingoli | Feb-21 | B.1.617   |
| GSEQ-900 Maharashtra Hingoli Feb-21 B.1.617   | GSEQ-900 | Maharashtra | Hingoli | Feb-21 | B.1.617   |
| GSEQ-904 Maharashtra Hingoli Feb-21 B.1.617   | GSEQ-904 | Maharashtra | Hingoli | Feb-21 | B.1.617   |
| GSEQ-899 Maharashtra Hingoli Feb-21 B.1.617   | GSEQ-899 | Maharashtra | Hingoli | Feb-21 | B.1.617   |
| GSEQ-894 Maharashtra Hingoli Feb-21 B.1.617   | GSEQ-894 | Maharashtra | Hingoli | Feb-21 | B.1.617   |
| GSEQ-                                         | GSEQ-    | Maharashtra | Hingoli | Feb-   | B.1.617   |

|                                                |          |                 |            |        |         |
|------------------------------------------------|----------|-----------------|------------|--------|---------|
| 897 Maharashtra Hingoli Feb-21 B.1.617         | 897      | ra              |            | 21     |         |
| GSEQ-650 Maharashtra Hingoli Feb-21 B.1.617    | GSEQ-650 | Maharasht<br>ra | Hingoli    | Feb-21 | B.1.617 |
| GSEQ-636 Maharashtra Hingoli Feb-21 B.1.617    | GSEQ-636 | Maharasht<br>ra | Hingoli    | Feb-21 | B.1.617 |
| GSEQ-766 Maharashtra Aurangabad Mar-21 B.1.617 | GSEQ-766 | Maharasht<br>ra | Aurangabad | Mar-21 | B.1.617 |
| GSEQ-794 Maharashtra Wardha Mar-21 B.1.617     | GSEQ-794 | Maharasht<br>ra | Wardha     | Mar-21 | B.1.617 |
| GSEQ-890 Maharashtra Hingoli Feb-21 B.1.617    | GSEQ-890 | Maharasht<br>ra | Hingoli    | Feb-21 | B.1.617 |
| GSEQ-778 Maharashtra Mumbai Mar-21 B.1.617     | GSEQ-778 | Maharasht<br>ra | Mumbai     | Mar-21 | B.1.617 |
| GSEQ-637 Maharashtra Hingoli Feb-21 B.1.617    | GSEQ-637 | Maharasht<br>ra | Hingoli    | Feb-21 | B.1.617 |
| GSEQ-651 Maharashtra Hingoli Feb-21 B.1.617    | GSEQ-651 | Maharasht<br>ra | Hingoli    | Feb-21 | B.1.617 |
| GSEQ-727 Maharashtra Thane Feb-21 B.1.617      | GSEQ-727 | Maharasht<br>ra | Thane      | Feb-21 | B.1.617 |
| GSEQ-731 Maharashtra Jalna Feb-21 B.1.617      | GSEQ-731 | Maharasht<br>ra | Jalna      | Feb-21 | B.1.617 |
| GSEQ-775 Maharashtra Mumbai Mar-21 B.1.617     | GSEQ-775 | Maharasht<br>ra | Mumbai     | Mar-21 | B.1.617 |
| GSEQ-687 Maharashtra Thane Mar-21 B.1.617      | GSEQ-687 | Maharasht<br>ra | Thane      | Mar-21 | B.1.617 |
| GSEQ-891 Maharashtra Hingoli Feb-21 B.1.617    | GSEQ-891 | Maharasht<br>ra | Hingoli    | Feb-21 | B.1.617 |
| GSEQ-732 Maharashtra Thane Mar-21 B.1.617      | GSEQ-732 | Maharasht<br>ra | Thane      | Mar-21 | B.1.617 |
| GSEQ-889 Maharashtra Hingoli Feb-21 B.1.617    | GSEQ-889 | Maharasht<br>ra | Hingoli    | Feb-21 | B.1.617 |

|                                             |          |             |            |        |           |
|---------------------------------------------|----------|-------------|------------|--------|-----------|
| GSEQ-653 Maharashtra Hingoli Feb-21 B.1.617 | GSEQ-653 | Maharashtra | Hingoli    | Feb-21 | B.1.617   |
| GSEQ-790 Maharashtra Wardha Mar-21 B.1.617  | GSEQ-790 | Maharashtra | Wardha     | Mar-21 | B.1.617   |
| GSEQ-896 Maharashtra Hingoli Feb-21 B.1.617 | GSEQ-896 | Maharashtra | Hingoli    | Feb-21 | B.1.617   |
| GSEQ-807 Maharashtra Wardha Mar-21 B.1.617  | GSEQ-807 | Maharashtra | Wardha     | Mar-21 | B.1.617   |
| GSEQ-776 Maharashtra Mumbai Mar-21 B.1.596  | GSEQ-776 | Maharashtra | Mumbai     | Mar-21 | B.1.596   |
| GSEQ-785 Maharashtra Wardha Mar-21 B.1.596  | GSEQ-785 | Maharashtra | Wardha     | Mar-21 | B.1.596   |
| GSEQ-773 Maharashtra Mumbai Mar-21 B.1.596  | GSEQ-773 | Maharashtra | Mumbai     | Mar-21 | B.1.596   |
| GSEQ-764 Maharashtra Aurangabad Mar-21 B.1  | GSEQ-764 | Maharashtra | Aurangabad | Mar-21 | B.1       |
| GSEQ-734 Maharashtra Thane Mar-21 B.1.596   | GSEQ-734 | Maharashtra | Thane      | Mar-21 | B.1.596   |
| GSEQ-777 Maharashtra Mumbai Mar-21 B.1.596  | GSEQ-777 | Maharashtra | Mumbai     | Mar-21 | B.1.596   |
| GSEQ-733 Maharashtra Thane Mar-21 B.1       | GSEQ-733 | Maharashtra | Thane      | Mar-21 | B.1       |
| GSEQ-902 Maharashtra Hingoli Feb-21 B.1.617 | GSEQ-902 | Maharashtra | Hingoli    | Feb-21 | B.1.617   |
| GSEQ-730 Maharashtra Jalna Mar-21 B.1.617   | GSEQ-730 | Maharashtra | Jalna      | Mar-21 | B.1.617   |
| GSEQ-685 Maharashtra Thane Mar-21 B.1.617   | GSEQ-685 | Maharashtra | Thane      | Mar-21 | B.1.617   |
| GSEQ-672 Maharashtra Thane Mar-21 B.1.617   | GSEQ-672 | Maharashtra | Thane      | Mar-21 | B.1.617   |
| GSEQ-                                       | GSEQ-    | Maharashtra | Hingoli    | Feb-   | B.1.36.29 |

|                                                  |          |                 |            |        |                |
|--------------------------------------------------|----------|-----------------|------------|--------|----------------|
| 893 Maharashtra Hingoli Feb-21 B.1.36.29         | 893      | ra              |            | 21     |                |
| GSEQ-663 Maharashtra Thane Mar-21 B.1.1.7        | GSEQ-663 | Maharasht<br>ra | Thane      | Mar-21 | B.1.1.7        |
| GSEQ-840 Maharashtra Bhandara Mar-21 B.1.1.7     | GSEQ-840 | Maharasht<br>ra | Bhandara   | Mar-21 | B.1.1.7        |
| GSEQ-682 Maharashtra Thane Mar-21 B.1.1.216      | GSEQ-682 | Maharasht<br>ra | Thane      | Mar-21 | B.1.1.216      |
| GSEQ-784 Maharashtra Wardha Mar-21 B.1.1.354     | GSEQ-784 | Maharasht<br>ra | Wardha     | Mar-21 | B.1.1.354      |
| GSEQ-686 Maharashtra Thane Mar-21 B.1.177.42     | GSEQ-686 | Maharasht<br>ra | Thane      | Mar-21 | B.1.177.4<br>2 |
| GSEQ-772 Maharashtra Mumbai Mar-21 B.1.36.29     | GSEQ-772 | Maharasht<br>ra | Mumbai     | Mar-21 | B.1.36.29      |
| GSEQ-842 Maharashtra Bhandara Mar-21 B.1.617     | GSEQ-842 | Maharasht<br>ra | Bhandara   | Mar-21 | B.1.617        |
| GSEQ-887 Maharashtra Hingoli Feb-21 B.1.1.354    | GSEQ-887 | Maharasht<br>ra | Hingoli    | Feb-21 | B.1.1.354      |
| GSEQ-781 Maharashtra Wardha Mar-21 B.1.474       | GSEQ-781 | Maharasht<br>ra | Wardha     | Mar-21 | B.1.474        |
| GSEQ-767 Maharashtra Aurangabad Mar-21 B.1.1.216 | GSEQ-767 | Maharasht<br>ra | Aurangabad | Mar-21 | B.1.1.216      |
| GSEQ-797 Maharashtra Wardha Feb-21 B.1.617       | GSEQ-797 | Maharasht<br>ra | Wardha     | Feb-21 | B.1.617        |
| GSEQ-644 Maharashtra Hingoli Feb-21 B.1.617      | GSEQ-644 | Maharasht<br>ra | Hingoli    | Feb-21 | B.1.617        |
| GSEQ-888 Maharashtra Hingoli Feb-21 B.1.617      | GSEQ-888 | Maharasht<br>ra | Hingoli    | Feb-21 | B.1.617        |
| GSEQ-798 Maharashtra Wardha Feb-21 B.1.1.306     | GSEQ-798 | Maharasht<br>ra | Wardha     | Feb-21 | B.1.1.306      |
| GSEQ-843 Maharashtra Bhandara Mar-               | GSEQ-843 | Maharasht<br>ra | Bhandara   | Mar-21 | B.1.617        |

|                                                 |           |             |          |        |           |
|-------------------------------------------------|-----------|-------------|----------|--------|-----------|
| 21 B.1.617                                      |           |             |          |        |           |
| GSEQ-854 Maharashtra Nanded Feb-21 B.1.617      | GSEQ-854  | Maharashtra | Nanded   | Feb-21 | B.1.617   |
| GSEQ-690 Maharashtra Thane Feb-21 B.1.617       | GSEQ-690  | Maharashtra | Thane    | Feb-21 | B.1.617   |
| GSEQ-1087 Maharashtra Thane Mar-21 B.1          | GSEQ-1087 | Maharashtra | Thane    | Mar-21 | B.1       |
| GSEQ-1105 Maharashtra Thane Mar-21 B.1.617      | GSEQ-1105 | Maharashtra | Thane    | Mar-21 | B.1.617   |
| GSEQ-1185 Maharashtra Alibag #N/A B.1.617       | GSEQ-1185 | Maharashtra | Alibag   | #N/A   | B.1.617   |
| GSEQ-954 Maharashtra #N/A Nov-20 B.1.36.29      | GSEQ-954  | Maharashtra | NA       | Nov-20 | B.1.36.29 |
| GSEQ-956 Maharashtra #N/A Nov-20 B.1.36         | GSEQ-956  | Maharashtra | NA       | Nov-20 | B.1.36    |
| GSEQ-955 Maharashtra #N/A Nov-20 B.1.36         | GSEQ-955  | Maharashtra | NA       | Nov-20 | B.1.36    |
| GSEQ-959 Maharashtra #N/A Nov-20 B.1.36         | GSEQ-959  | Maharashtra | NA       | Nov-20 | B.1.36    |
| GSEQ-958 Maharashtra #N/A Nov-20 B.1.36.29      | GSEQ-958  | Maharashtra | NA       | Nov-20 | B.1.36.29 |
| GSEQ-957 Maharashtra #N/A Nov-20 B.1.36.29      | GSEQ-957  | Maharashtra | NA       | Nov-20 | B.1.36.29 |
| GSEQ-1079 Maharashtra Mumbai Mar-21 B.1.1.306   | GSEQ-1079 | Maharashtra | Mumbai   | Mar-21 | B.1.1.306 |
| GSEQ-1080 Maharashtra Mumbai Mar-21 B.1.617     | GSEQ-1080 | Maharashtra | Mumbai   | Mar-21 | B.1.617   |
| GSEQ-1081 Maharashtra Mumbai Mar-21 B.1.1.306   | GSEQ-1081 | Maharashtra | Mumbai   | Mar-21 | B.1.1.306 |
| GSEQ-2712 Maharashtra Yavatmal Feb-21 B.1.36.29 | GSEQ-2712 | Maharashtra | Yavatmal | Feb-21 | B.1.36.29 |



|                                                   |              |             |         |        |           |
|---------------------------------------------------|--------------|-------------|---------|--------|-----------|
| VOC-1121 Maharashtra Mumbai Dec-20 B.1.36.29      | VOC-1121     | Maharashtra | Mumbai  | Dec-20 | B.1.36.29 |
| GSEQ-6571 Maharashtra Mumbai Mar-21 B.1.1.306     | GSEQ-6571    | Maharashtra | Mumbai  | Mar-21 | B.1.1.306 |
| SEQ-29188TCM Maharashtra Melghat Jan-21 B.1.1.421 | SEQ-29188TCM | Maharashtra | Melghat | Jan-21 | B.1.1.421 |

**Supplementary Table2:** Intra and inter-molecular interactions of wild and mutant spike RBD of SARS-CoV-2 with ACE2. The bonds that are highlighted indicate those that are disrupted in the mutant strain

| <b>Spike RBD with ACE2 (6LZG.pdb) (wild)</b> |                      |             |                              |
|----------------------------------------------|----------------------|-------------|------------------------------|
| <b>Interactions</b>                          |                      |             |                              |
| <b>Sr. No.</b>                               | <b>RBD-Wild Type</b> | <b>ACE2</b> | <b>Type</b>                  |
| 1                                            | K417                 | D30         | Hydrogen Bond; Electrostatic |
| <b>2</b>                                     | <b>E484</b>          | <b>K31</b>  | <b>Electrostatic</b>         |
| 3                                            | A475                 | S19         | Hydrogen Bond                |
| 4                                            | N487                 | Q24         | Hydrogen Bond                |
| 5                                            | T500                 | Y41         | Hydrogen Bond                |
| 6                                            | G496                 | K353        | Hydrogen Bond                |
| 7                                            | Y449                 | D38         | Hydrogen Bond                |
| 8                                            | Y449                 | Q42         | Hydrogen Bond                |
| 9                                            | N487                 | Y83         | Hydrogen Bond                |
| 10                                           | Q493                 | E35         | Hydrogen Bond                |
| 11                                           | Q498                 | Q42         | Hydrogen Bond                |
| 12                                           | Q498                 | Q42         | Hydrogen Bond                |
| 13                                           | G502                 | K353        | Hydrogen Bond                |
| 14                                           | Y453                 | H34         | Hydrogen Bond                |
| 15                                           | F486                 | Y83         | Hydrogen Bond                |
| 16                                           | N501                 | Y41         | Hydrogen Bond                |
| 17                                           | L455                 | H34         | Hydrophobic                  |
| 18                                           | F486                 | Y83         | Hydrophobic                  |
| 19                                           | Y505                 | K353        | Hydrophobic                  |
| 20                                           | F486                 | M82         | Hydrophobic                  |
| 21                                           | Y489                 | K31         | Hydrophobic                  |
| 22                                           | Y505                 | K353        | Hydrophobic                  |
| <b>23</b>                                    | <b>L452-L492</b>     | <b>-</b>    | <b>Hydrophobic</b>           |

| 24                                                               | F490-L492              | -           | Hydrophobic                  |
|------------------------------------------------------------------|------------------------|-------------|------------------------------|
| <b>Spike RBD with ACE2 (6LZG.pdb) (L452R &amp; E484Q Mutant)</b> |                        |             |                              |
| <b>Interactions</b>                                              |                        |             |                              |
| <b>Sr. No.</b>                                                   | <b>RBD-Mutant Type</b> | <b>ACE2</b> | <b>Type</b>                  |
| 1                                                                | K417                   | D30         | Hydrogen Bond; Electrostatic |
| 2                                                                | A475                   | S19         | Hydrogen Bond                |
| 3                                                                | N487                   | Q24         | Hydrogen Bond                |
| 4                                                                | T500                   | Y41         | Hydrogen Bond                |
| 5                                                                | G496                   | K353        | Hydrogen Bond                |
| 6                                                                | Y449                   | D38         | Hydrogen Bond                |
| 7                                                                | Y449                   | Q42         | Hydrogen Bond                |
| 8                                                                | N487                   | Y83         | Hydrogen Bond                |
| 9                                                                | Q493                   | E35         | Hydrogen Bond                |
| 10                                                               | Q498                   | Q42         | Hydrogen Bond                |
| 11                                                               | Q498                   | Q42         | Hydrogen Bond                |
| 12                                                               | G502                   | K353        | Hydrogen Bond                |
| 13                                                               | Y453                   | H34         | Hydrogen Bond                |
| 14                                                               | F486                   | Y83         | Hydrogen Bond                |
| 15                                                               | N501                   | Y41         | Hydrogen Bond                |
| 16                                                               | L455                   | H34         | Hydrophobic                  |
| 17                                                               | F486                   | Y83         | Hydrophobic                  |
| 18                                                               | Y505                   | K353        | Hydrophobic                  |
| 19                                                               | F486                   | M82         | Hydrophobic                  |
| 20                                                               | Y489                   | K31         | Hydrophobic                  |
| 21                                                               | Y505                   | K353        | Hydrophobic                  |
| 22                                                               | F490-L492              | -           | Hydrophobic                  |

**Supplementary Table3:** Intermolecular interaction of neutralizing antibodies with wild and mutant spike RBD of SARS-CoV-2

| A | <b>Spike RBD with Antibody REGN10933 (Wild)</b>   |                 |                  |
|---|---------------------------------------------------|-----------------|------------------|
|   | <b>Interactions</b>                               |                 |                  |
|   | <b>RBD</b>                                        | <b>Antibody</b> | <b>Type</b>      |
| 1 | GLU484                                            | H: TYR53        | Hydrogen Bond    |
|   |                                                   | H:SER56         |                  |
| 2 | LYS417                                            | H:ASP31         | Hydrogen Bond    |
|   |                                                   | H:THR28         |                  |
| 3 | PHE486                                            | L: LEU94        | Hydrophobic      |
|   |                                                   | H: ARG100       | Electrostatic    |
|   |                                                   | H:TYR59         | Hydrogen bond    |
| 4 | TYR489                                            | H: TYR53        | Hydrophobic      |
|   | TYR489                                            | H:TYR33         | Hydrogen Bond    |
| 5 | TYR453                                            | H:ASP31         | Hydrogen Bond    |
| 6 | LYS417                                            | H:ASP31         | Hydrogen Bond    |
| 7 | ALA475                                            | H:MET104        | Hydrophobic bond |
| B | <b>Spike RBD with Antibody REGN10933 (Mutant)</b> |                 |                  |
|   | <b>Interactions</b>                               |                 |                  |
|   | <b>RBD</b>                                        | <b>Antibody</b> | <b>Type</b>      |
| 1 | LYS417                                            | H:ASP31         | Hydrogen Bond    |
|   |                                                   | H: THR28        |                  |
| 2 | TYR453                                            | H :ASP31        | Hydrogen Bond    |
| 3 | PHE486                                            | H: ARG100       | Hydrogen Bond    |
|   |                                                   | L: LEU94        |                  |
|   |                                                   | H:TYR59         |                  |
| 4 | ALA475                                            | H:MET104        | Hydrophobic bond |
| 5 | TYR489                                            | H:TYR53         | Hydrophobic      |
| 6 | GLN484                                            | H:SER56         | Hydrogen bond    |

|   |                                                  |                 |                              |
|---|--------------------------------------------------|-----------------|------------------------------|
| 7 | CYS488                                           | H:TYR33         | Hydrogen bond                |
| C | <b>Spike RBD with Antibody P2B-2F6(Wild)</b>     |                 |                              |
|   | <b>Interactions</b>                              |                 |                              |
|   | <b>RBD</b>                                       | <b>Antibody</b> | <b>Type</b>                  |
| 1 | LEU452                                           | H: ILE103       | Hydrophobic                  |
|   |                                                  | H:VAL105        |                              |
| 2 | GLU484                                           | L: ASN33        | Hydrogen bond                |
|   |                                                  | L:TYR34         |                              |
| 3 | GLU484                                           | H:ARG112        | Hydrogen bond; Electrostatic |
| 4 | PHE490                                           | H: VAL106       | Hydrophobic                  |
|   |                                                  | H:PRO107        |                              |
| 5 | TYR449                                           | H: SER31        | Hydrogen bond                |
| 6 | ASN450                                           | H: SER30        | Hydrogen bond                |
|   |                                                  | H:SER31         |                              |
| 7 | GLY447                                           | H: TYR27        | Hydrogen bond                |
| D | <b>Spike RBD with Antibody P2B-2F6 A(Mutant)</b> |                 |                              |
|   | <b>Interactions</b>                              |                 |                              |
|   | <b>RBD</b>                                       | <b>Antibody</b> | <b>Type</b>                  |
| 1 | GLN484                                           | L: ASN33        | Hydrogen bond                |
|   |                                                  | L: TYR34        |                              |
| 2 | ASN450                                           | H: SER30        | Hydrogen bond                |
|   |                                                  | H:SER31         |                              |
| 3 | PHE490                                           | H: VAL106       | Hydrophobic                  |
|   |                                                  | H: PRO107       |                              |
